# Supplementary material for: Concentration, temporal variation and sources of black carbon in the Mount Everest region retrieved by real-time observation and simulation
Source: Copernicus journal article supplement (doi:10.5194/acp-2018-183), 2018-03-09
Supplement: Supplementary file [file acp-2018-183-RC4-supplement.pdf]

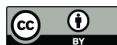

# 1 Concentration, temporal variation and sources of black carbon in the 2 Mount Everest region retrieved by real-time observation and simulation

3 Xintong Chen<sup>1,4</sup>, Shichang Kang<sup>1,2,4</sup>, Zhiyuan Cong<sup>2,3</sup>, Junhua Yang<sup>1</sup>, Yaoming Ma<sup>3</sup>

4 <sup>1</sup>State Key Laboratory of Cryospheric Science, Northwest Institute of Eco-Environment and Resources, Chinese Academy of  
5 Sciences, Lanzhou 730000, China

6 <sup>2</sup>CAS Center for Excellence in Tibetan Plateau Earth Sciences, Chinese Academy of Sciences, Beijing, 100101, China

7 <sup>3</sup>Key Laboratory of Tibetan Environment Changes and Land Surface Processes, Institute of Tibetan Plateau Research, Chinese  
8 Academy of Sciences, Beijing 100101, China

9 <sup>4</sup>University of Chinese Academy of Sciences, Beijing 100049, China.

10 *Correspondence to:* Shichang Kang (shichang.kang@lzb.ac.cn)

11 **Abstract.** Based on the high-resolution measurement of black carbon (BC) at Qomolangma (Everest) station of Chinese  
12 Academy of Sciences during 15 May 2015 to 31 May 2017, we investigated the seasonal and diurnal variations of BC and its  
13 potential source regions. Monthly and daily mean BC concentrations reached the highest values in the pre-monsoon season  
14 which are at least one magnitude higher than the lowest values in the monsoon season. For the diurnal variation, BC  
15 concentrations were significantly greater from mid-night to noon in the pre-monsoon season and showed increasing trend in  
16 the afternoon in the non-monsoon seasons, implying the potential contribution from the long-range transport. In the monsoon  
17 season, BC concentrations appeared two peaks in the morning and after the noon. It might be affected by the local anthropogenic  
18 activities. Analyzing the simulation results from the backward air-mass trajectories and the fire spots distribution from the  
19 MODIS data, we found that the seasonal cycle of BC was significantly influenced by atmospheric circulation and combustion  
20 intensity in the Mt. Everest region. The transport mechanisms of BC were revealed using WRF-Chem simulation during severe  
21 pollution episodes. For the pollution event in the monsoon season, BC aerosols in South Asia could be uplifted and transported  
22 to the Mt. Everest region by the southward winds in the upper atmosphere. However, for the events in the pre-monsoon season,  
23 BC from northern India was brought and concentrated in the southern slope of the Himalayas by the northwesterly winds in  
24 the lower atmosphere and then transported across the Himalayas by the mountain-valley wind, while relatively less BC from  
25 northwestern India and Central Asia could be transported to the Mt. Everest region by the westerly winds in the upper  
26 atmosphere.

## 27 1 Introduction

28 Black Carbon (BC), from the incomplete combustion of fossil fuels or biomass burning, has drawn lots of attention due  
29 to its influences on environment and human health (Anenberg et al., 2012; Bond, 2004; Ramanathan et al., 2005), and is seen  
30 as an important factor that may lead to global warming besides greenhouse gases (Hansen et al., 2000; Jacobson, 2002; Bond  
31 et al., 2013). BC can greatly absorb solar radiation and causes atmosphere heating (Jacobson, 2001; Ramanathan et al., 2005;



32 Ji et al., 2015). Moreover, BC as fine particles can **suspend** the atmosphere for about one week and **transport** away from  
33 its emission sources, and be removed by dry and wet deposition (Oshima et al., 2012; Cooke et al., 2002; Jurado et al., 2008).  
34 When BC **deposits** on snow and ice, it can significantly reduce surface albedo and accelerate glacier and snow cover melting,  
35 causing the impact on regional climate, hydrology, and water resources (Ming et al., 2008; Li et al., 2018; Ramanathan and  
36 Carmichael, 2008).

37 The Tibetan Plateau (TP), generally known as the “Third Pole”, is the highest plateau with a large number of glaciers and  
38 snow cover (Kang et al., 2010; Lu et al., 2010; Yao et al., 2012). Even though the TP **is** a high altitude region with little affected by  
39 anthropogenic activities, previous observations have indicated that BC is an important contributor to the rapid shrinking of  
40 glaciers over the TP via decreasing surface albedo and atmospheric warming (Xu et al., 2009; Yang et al., 2015; Yasunari et  
41 al., 2010; Li et al., 2017; Zhang et al., 2017b; Qu et al., 2014; Ji, 2016; Xu et al., 2016). Moreover, previous studies have also  
42 suggested that the emissions from South Asia and East Asia are the major sources of BC in the TP (Lu et al., 2012; He et al.,  
43 2014; Zhang et al., 2015; Yang et al., 2018), and the high emissions from South Asia can cross the Himalayas and further  
44 transport to the inland of the TP (Luthi et al., 2015; Xu et al., 2014; Cong et al., 2015a; Kang et al., 2016; Wan et al., 2015).  
45 Meanwhile, seasonality of BC aerosols are closely related to atmospheric circulation that helps to bring the BC aerosols across  
46 the Himalayas (Cong et al., 2015a; Yang et al., 2018; Zou et al., 2008). Additionally, a large number of studies have also  
47 demonstrated that the BC and dust from Central Asia and Northern Africa could also be transported to the TP (Wang et al.,  
48 2016; Lu et al., 2012; Zhao et al., 2012; Wu et al., 2010; Zhang et al., 2015).

49 Mt. Everest could be regarded as **the** a sensitive area under the influence of BC aerosols. Previous research on  
50 atmospheric BC in the Mt. Everest region was mainly based on thermal/optical analytical method, using quartz filter samples  
51 (Cong et al., 2015a). However, **investigating in diurnal and seasonal variations of BC still lacks in the region**. Therefore, to  
52 **fulfill** the gaps and understand the variations and sources of BC in the pristine region, there is a need for an efficient approach  
53 and studies. The aethalometer can provide high-resolution and continuous real-time observation data on BC concentration  
54 which is very important and necessary to better depict the characteristics of BC and its effects on the environmental change.

55 In comparison with the observation, **the numerical models** better represent the atmospheric physical and chemical  
56 processes. Many studies have used global climate models (GCMs) and chemical transport models (CTMs) to investigate the  
57 origin and transportation of BC over the TP (Lu et al., 2012; Zhang et al., 2015; Menon et al., 2010; Kopacz et al., 2011).  
58 However, due to the coarse resolution, it is difficult for the CTMs and GCMs to capture the surface details of the TP (Ji et al.,  
59 2015; Gao et al., 2008). Regional climate models (RCMs) can compensate for the shortcomings of coarser global model grids  
60 by **the** high-resolution simulations. In the recent decades, RCMs have been developed to include multiple modules and  
61 atmospheric chemistry processes. Also the advanced regional climate-chemistry model, Weather Research and Forecasting  
62 (WRF) model (Skamarock et al., 2005); with Chemistry (WRF-Chem), has been successfully applied for air quality research  
63 in the TP region (Yang et al., 2017; Yang et al., 2018).

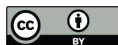

64 Here, we present real-time data of BC concentration measured by the new generation aethalometer (AE-33), from 15 May  
65 2015 to 31 May 2017. The observed results are used to characterize the temporal variation and provide the solid information  
66 on the possible sources and transport mechanism of BC. Combined high-resolution measurement of BC concentration and  
67 WRF-Chem model investigated the concentration level, temporal variation, and sources of BC in the Mt. Everest region.  
68 The purpose of this study is to understand the impact of trans-boundary atmospheric BC on the Mt. Everest region and depict  
69 the transport pathways of BC in different spatiotemporal scales.

## 70 2 Materials and methods

### 71 2.1 Sampling site and meteorological condition

72 Mt. Everest (27.98°N, 86.92°E, 8844 m a.s.l.), the summit of the world, is located in the central Himalayas. The southern  
73 slope of the Mt. Everest is adjacent to the Indian continent, and the climate is warm and humid under the influence of the  
74 Indian summer monsoon. Conversely, the northern side is cold and dry since the warm and humid airflow cannot reach there.  
75 The Qomolangma Atmospheric and Environmental Observation and Research Station (QOMS, 28.36°N, 86.95°E, 4276 m  
76 a.s.l.) of Chinese Academy of Sciences (Fig. 1) is located in the northern slope of the Mt. Everest, which was established for  
77 the continuous monitoring of atmospheric environment (Cong et al., 2015a; Ma et al., 2011).

78 The meteorological parameters, i.e., air temperature, air pressure, humidity, wind speeds and wind direction, were  
79 recorded by an automatic weather station at QOMS. Meanwhile, the precipitation data were collected by artificial measurement,  
80 as shown in Fig. 2. The entire year was divided into four seasons according to the Indian monsoon transitions characteristics,  
81 which includes pre-monsoon (March to May), monsoon (June to September), post-monsoon (October to November), and  
82 winter (December to February) (Praveen et al., 2012; Zhang et al., 2017a). A clear seasonal cycle of temperature and humidity  
83 could be observed from Fig. 2. Specifically, higher temperature was observed during the monsoon season while lower during  
84 winter, with a maximum in July and a minimum in January. Humidity followed the similar trend, with higher values from late  
85 July to early August and lower values from December to February. During the observation period, the wind speed increased  
86 significantly from November to April. The wind direction at QOMS is affected by the local topography through a series of  
87 small valleys. During the pre-monsoon season (Dry-period), the westerly and southerly winds begin to develop and play the  
88 important role in atmospheric pollution circulation. However, during the monsoon season, southwesterly winds prevail and  
89 bring much moisture from the Indian Ocean to the Mt. Everest region increasing the humidity and precipitation. With the  
90 retreat of monsoon, southwesterly winds decrease and the predominant direction changes to westerly and northeasterly in  
91 winter with limited moisture (Fig. 2).

### 92 2.2 BC measurements



93 The airborne BC concentrations at QOMS were monitored by the “Next Generation” aethalometer model AE-33 (Magee  
94 Scientific Corporation, USA). The instrument was set in an indoor room with inlet installed at about 3 m above the ground  
95 level and was operated at an airflow rate of 4 LPM with 1 min time resolution at QOM.

96 AE-33 has seven fixed wavelengths (i.e., 370, 470, 520, 590, 660, 880 and 950 nm), which can acquire BC concentration  
97 according to light absorption and attenuation characteristics from the different wavelengths (Hansen et al., 1984; Drinovec et  
98 al., 2014). Generally, BC concentration measured at 880 nm is used as the actual BC concentration in the atmosphere, as the  
99 absorption of other species of aerosols is greatly reduced in this wavelength (Sandradewi et al., 2008a; Sandradewi et al.,  
100 2008b; Fialho et al., 2005; Yang et al., 2009; Drinovec et al., 2014). Compared to previous aethalometers, AE-33 uses doulspot  
101 method and a real-time calculation of the “loading compensation parameter”, which can compensate for the “spot loading  
102 effect” and obtain high quality BC concentration (Drinovec et al., 2014). The algorithm is as follows:

$$103 \text{ BC (reported)} = \text{BC(zero loading)} \times (1 - k\text{ATN}) \quad (1)$$

$$104 \text{ ATN} = -100 \ln(I/I_0) \quad (2)$$

$$105 \text{ BC1} = \text{BC} \times (1 - k\text{ATN1}) \quad (3)$$

$$106 \text{ BC2} = \text{BC} \times (1 - k\text{ATN2}) \quad (4)$$

107 Where, BC (reported) is the non-compensated BC concentration; BC (zero loading) is the desired ambient BC value that would  
108 be obtained in the absence of any loading effect; k is the loading compensation parameter; I and I<sub>0</sub> are the light intensity of the  
109 measurement spot and reference spot; ATN is the attenuation coefficient. BC component of aerosols is analyzed on two parallel  
110 spots drawn from the same input stream in AE-33, but collected at different rates of accumulation. It means that we can obtain  
111 different ATN but the same loading parameter k (Drinovec et al., 2014). Combining Eq. (3) and Eq. (4), the “loading  
112 compensation parameter” k and the desired value of BC compensated back to zero loading can be calculated.

### 113 2.3 Model simulation and datasets

114 The WRF-Chem version 3.6 was used to analyze the spatial distribution, transport mechanism, and source apportionment  
115 of BC during the four observed pollution episodes. The WRF-Chem model is the expansion of WRF meteorological model  
116 and considers complex physical and chemical process such as the emission and deposition, advection and diffusion, gaseous  
117 and aqueous chemical transformation, and aerosol chemistry and dynamics (Grell et al., 2005). Here, the numerical  
118 experiments were performed at 25 km horizontal resolution with 122 and 101 grid cell in the west-east direction and north-  
119 south, respectively. The simulated domain was centered at 25°N, 82.5°E and had a 30-layer structure with the top pressure of  
120 50 hPa. Key physical and chemical parameterization options for the WRF-Chem modeling were according to previous  
121 study in the TP (Yang et al., 2018). The initial meteorological fields were from National Centers for Environmental Prediction  
122 (NECP) reanalysis data with a horizontal resolution of 1° × 1° at 6-h time intervals. The anthropogenic emission inventory  
123 was obtained from the Intercontinental Chemical Transport Experiment-Phase B (INTEX-B) (Zhang et al., 2009) with a



124 resolution of  $0.5^\circ \times 0.5^\circ$ . The biogenic emissions were from the Model of Emission of Gases and Aerosol from Nature  
125 (MEGAN), and the fire emissions inventory was based on the fire inventory from NCAR (FINN) (Wiedinmyer et al., 2011).  
126 Additionally, the Model for Ozone and Related chemical Tracers (MOZART, [http://www.acom.ucar.edu/wrf-](http://www.acom.ucar.edu/wrf-chem/mozart.shtml)  
127 [chem/mozart.shtml](http://www.acom.ucar.edu/wrf-chem/mozart.shtml)) (Emmons et al., 2010) dataset were used to create improved initial and boundary conditions for BC  
128 simulations during these pollution episodes.

129 Furthermore, predicting the source region of BC, we used HYSPLIT-4 model to calculate the backward trajectories of air  
130 masses, and the data for calculation were from National Centers for Environmental Prediction/National Center for Atmospheric  
131 Research (NCEP/NCAR) data ( $2.5^\circ \times 2.5^\circ$ , 17 vertical levels). The active fire product provided by Fire Information for  
132 Resource Management System (FIRMS, <https://firms.modaps.eosdis.nasa.gov/firemap/>), was chosen to investigate the  
133 biomass burning emissions over the region in different seasons.

### 134 3. Results and discussion

#### 135 3.1 Temporal variations of BC

##### 136 3.1.1 Monthly variation of BC

137 Monthly mean BC concentrations at QOMS is shown in Fig. 3a. There was a significant increase in BC concentrations in  
138 winter and the highest value occurred during the pre-monsoon season ( $923.1 \pm 685.8 \text{ ng/m}^3$  in April). Meanwhile, during  
139 monsoon, the lower BC concentrations were recorded and the lowest value was observed in July ( $88.5 \pm 29.8 \text{ ng/m}^3$ ). This  
140 seasonal change was consistent with the previous studies of element carbon (EC or BC) at Nepal Climate Observatory-Pyramid  
141 station (NCO-P,  $27.95^\circ\text{N}$ ,  $86.82^\circ\text{E}$ , 5079m a.s.l.) (Fig. 3b) (Marinoni et al., 2010) and at QOMS (Fig. 3c) (Cong et al., 2015a),  
142 indicating that the similar BC source between the southern and northern sides of the Himalayas. The EC was sampled by  
143 the quartz filters and detected using the thermal/optical analytical method in the previous studies, there may have been some  
144 disparities in the values of EC with these of BC. The monthly variation of EC at Nam Co Monitoring and Research Station for  
145 Multisphere Interactions (Nam Co station,  $30.46^\circ\text{N}$ ,  $90.59^\circ\text{E}$ , 4730 m a.s.l.) (Fig. 3d) (Wan et al., 2015) also showed the similar  
146 variation, but the peak value of EC occurred in winter. Additionally, monthly mean EC concentrations at Nam Co station were  
147 generally lower than that at QOMS, suggesting that anthropogenic activities impacts in the inland TP were weaker than that in  
148 the south edge of the TP. Previous studies have demonstrated that the influence of polluted air masses from the “Atmospheric  
149 Brown Clouds” over South Asia could reach to the southern foothills of the Himalayas, and the mountain-valley breeze  
150 circulation carried the polluted air masses onto the TP (Luthi et al., 2015; Cong et al., 2015a; Bonasoni et al., 2008; Yang et  
151 al., 2018). Therefore, the seasonal cycle of BC concentrations at QOMS was likely affected by the atmospheric circulation and  
152 the emissions from South Asia, and these will be further explained in Section 3.3.

##### 153 3.1.2 Daily variation of BC



154 Fig. 4 shows the daily mean BC concentrations at QOMS which presents a significant seasonal pattern, with a maximum  
155 during the pre-monsoon season ( $2772.3 \text{ ng/m}^3$ ) and a minimum during the monsoon season ( $36.4 \text{ ng/m}^3$ ). During the monsoon  
156 season, BC concentration was observed to be lower than  $150 \text{ ng/m}^3$ , but it gradually increased during the post-monsoon and  
157 winter. The mean concentration of daily BC at QOMS was  $298.8 \pm 341.3 \text{ ng/m}^3$ , which was close to the previous result ( $250$   
158  $\pm 220 \text{ ng/m}^3$ ) (Cong et al., 2015a). Such a result demonstrates that our results are consistent with the previous finding and  
159 systematic sampling of aerosol is also important to obtain BC values in the region

160 The comparison between daily mean BC concentrations (Fig. 4) and the meteorological parameters (Fig. 2) suggested  
161 that the increasing humidity and precipitation during monsoon led to washout of atmospheric particles promoting the wet  
162 deposition of BC process caused a decrease in BC concentrations during monsoon representing the background level  
163 during the period. The prevailing wind direction during the monsoon period was southwesterly while in non-monsoon was  
164 dominated by westerly. Therefore, the variations of BC might be linked to the influence of meteorological conditions and the  
165 contribution of long-distance transport from urbanized areas to QOMS. Moreover, it cannot be ignored that there were  
166 continuous high concentrations of BC above  $1000 \text{ ng/m}^3$  during 8-10 June 2015, 19-22 March 2016, 9-18 April 2016, and 11-  
167 14 April 2017, indicating the heavy pollution episodes happened at QOMS during those days. The detailed analysis for these  
168 pollution events is presented in Section 3.4.

### 169 3.1.3 Diurnal variation of BC

170 Diurnal variation characteristics can be used to analyze the impact of local meteorological process and anthropogenic  
171 activities on BC concentrations at QOMS. The half-hourly mean BC concentrations are presented in Fig. 5. The diurnal BC  
172 concentrations in the pre-monsoon season were significantly higher than those in other seasons, and remained high values from  
173 mid-night to noon and increased gradually after the lowest value around 15:00 similar increasing trend for BC was  
174 observed in the afternoon mostly during the post-monsoon and winter periods, and highest BC concentration occurred from  
175 mid-night to noon. During the monsoon season, the BC concentrations remained low values with two peaks in the morning  
176 and after the noon respectively. Previous studies have demonstrated that the local wind system in the northern slope of the Mt.  
177 Everest were composed by morning “valley wind”, a late morning-afternoon “glacier wind” weakened by “valley wind”,  
178 and an evening-early night “mountain wind” (Zou et al., 2008). The QOMS is located in the s-shape valley north of the Mt.  
179 Everest (Ma et al., 2011). The down mountain wind or glacier wind from south developed in the afternoon and at night, which  
180 provided the potential possibility for pollutants from long-distance source transported to QOMS along the valley and enable  
181 the increase of BC concentrations in the non-monsoon periods. The valley wind from north in the morning, could bring the  
182 short-distance emissions from local cooking or heating QOMS. BC concentrations appeared two peaks in the morning and  
183 after the noon in the monsoon season, which might be owing to the surrounding local emissions

184 To explain the significant high values during mid-night to noon in the pre-monsoon season, the wind direction frequency



185 at QOMS during 0:00-12:00 and 12:00-24:00 are presented in Fig. 6. During the sampling period in the pre-monsoon season,  
186 W (west) winds prevailed from mid-night to noon (Fig. 6a), accounting for 18.1% of the total wind directions, followed by  
187 ENE (east-northeast) winds (16.4%). It is consistent with the discussion above that there exists potential impacts on BC  
188 concentrations at QOMS from long-distance human activity emissions, which can be carried by westerly winds, i.e., down  
189 mountain winds (Cong et al., 2015b). Moreover, the WRF-Chem simulation results showed that, the profile of equivalent  
190 potential temperature (EPT) increased with altitude and the planetary boundary layer height (PBLH) and wind speed were  
191 much lower from mid-night to noon (Fig. S1), indicating a more stable atmosphere that obstructs the diffusion of BC aerosols.  
192 While ESE (east-southeast) and NE (northeast) winds prevailed from noon to mid-night (Fig. 6b), accounting for 17.6% and  
193 15.3% of total wind directions, respectively. Several villages are located easterly (around 5 km away) from QOMS thus lower  
194 BC values might reflect the short-distance emission sources.

### 195 3.2 Comparison of BC concentrations with other sites in the TP

196 In order to better understand the BC loading level, we compared our results with previous studies from other locations  
197 over the TP. As listed in Table 1, BC concentrations on Muztagh Ata Mountain and Qilian Mountain presented lower values,  
198 which can be regarded as the background concentration level for inland Asia (Zhao et al., 2012; Cao et al., 2009). In contrast,  
199 observed BC concentrations at QOMS were relatively higher than other remote locations in the TP, which has an increasing  
200 trend from the southern edge of the TP to the inland TP. Such as Nam Co and Ranwu, sites are isolated from anthropogenic  
201 activities with relatively clean atmospheric environments, but BC concentration at these two sites is recorded up to 130 ng/m<sup>3</sup>,  
202 which may be likely due to the influence of long-range transport from South Asia (Wan et al., 2015; Wang et al., 2016).  
203 Compared with locations in the southern slope of the Himalayas (e.g., NCO-P and Manora Peak), the BC concentration at  
204 QOMS was close to that at NCO-P, but much lower than that at Manora Peak, which is near to the polluted areas in South Asia,  
205 and largely affected by anthropogenic emissions (Marinoni et al., 2010; Ram et al., 2010). It implied that combustion emissions  
206 from South Asia not only can affect the lower latitudes in the vicinity, but also can be transported to the higher latitudes in the  
207 Himalayas and even to the TP. However, the BC concentration at Lhasa city was higher than other remote sites in the TP, which  
208 was mainly from the local vehicle emissions (Li et al., 2016). But for BC concentration at Qinghai Lake, it was higher than  
209 that at the other south sites in the TP, because of the long-range transport of higher anthropogenic emissions from easterly and  
210 significant input from westerly (Li et al., 2013). On the whole, the BC concentrations over the TP varies with atmospheric  
211 circulation and upwind emission sources, and the high level of BC at QOMS suggest the significant influence of anthropogenic  
212 emissions from South Asia.

### 213 3.3 Potential sources and transport mechanism of BC in different seasons

214 The seasonal variation of BC concentrations was correlated with combustion intensity of sources and atmospheric



215 circulation. The “Atmospheric Brown Clouds” over South Asia contains large amounts of aerosol components such as the high  
216 loading emissions of BC from biomass burning, which can reach the TP within a few days (Ramanathan et al., 2005; Luthi et  
217 al., 2015; Ramanathan and Ramana, 2005). Previous study has identified biomass burning source contributing to BC aerosols  
218 in the Himalayas, and showed that the major fires were concentrated in March to June, besides, most vegetation fires occurred  
219 in the low elevation areas in South Asia and were mainly from croplands and forests (Vadrevu et al., 2012). Therefore, we  
220 further checked the biomass burning emissions in the Mt. Everest region and its vicinities using the active fire product from  
221 the MODIS data at four seasons (August 2015 to April 2016) provided by the FIRMS (Fig. 7). It is clearly understood  
222 there were large numbers of active fire spots in northern and central India, also in Pakistan and Nepal in winter and the pre-  
223 monsoon season, indicating that the agricultural combustion and forest fires contributed much to BC aerosols. During the  
224 monsoon season, no active fire spots distributed in South Asian region, representing the low biomass burning in that period.

225 To further explore the sources and the long-range transport mechanism of BC aerosols at QOMS, we calculated the  
226 frequency plots for 5-day backward trajectories arriving 1 km above the ground level (Fig. 8). During the non-monsoon seasons,  
227 air masses were affected by the westerly winds. The air masses reaching the Mt. Everest region were mostly from the northwest,  
228 indicating that the biomass burning emissions in Pakistan, northern Indian and Nepal could be transported to the Mt. Everest  
229 region. But for the difference of combustion intensity, the high concentrations of BC were found only during the pre-monsoon  
230 season. During the monsoon season, the southerly winds dominated in the Mt. Everest region and the air masses were mainly  
231 from the Arabian Sea and the Bay of Bengal with lots of moisture. At this period, the precipitation in the southern side of the  
232 Himalayas was above 1200 mm (Xu et al., 2014), which can improve the wet removal efficiency of BC. Moreover, the biomass  
233 combustion emissions in South Asia during this period were very low. Therefore, BC concentrations at QOMS were close to  
234 the background level during the monsoon season. Meanwhile, the local meteorological conditions also play a very important  
235 role in the transport of pollutants across the Himalayas from South Asia. Previous studies have shown that the local wind  
236 system was mainly composed by the uplift surface heating wind in the southern slope and downward glacier wind in the  
237 northern slope, which facilitates the exchange of air between bottom and upside of the atmosphere, also facilitates the coupling  
238 of airflow between the southern and northern slopes, which allows the pollutants from South Asia cross the Himalayas and  
239 transport to the TP from valley easily (Cong et al., 2015b; Zou et al., 2008; Tripathee et al., 2017; Chen et al., 2012; Dhungel  
240 et al., 2018).

### 241 3.4 Pollution episodes analysis by WRF-Chem modeling

242 In this section, we analyzed four pollution events with BC concentrations above 1000 ng/m<sup>3</sup> in detail, including event A  
243 during 8-10 June 2015, event B during 19-22 March 2016, event C during 9-18 April 2016, and event D during 11-14 April  
244 2017. Fig. 9 shows the spatial characteristic of the WRF-Chem modeled surface BC concentrations during the four pollution  
245 episodes. It can be seen that, the high values of surface BC concentrations always appeared in South Asia, although the high-





246 value centers changed in different pollution events. For event A, the most serious pollution appeared in Nepal and northern  
247 India. Relatively, there were less BC nearby the Mt. Everest in event B. However, for event C, the high-value areas for BC  
248 concentrations were mainly along the southern slope of the Himalayas in Nepal and in the east of India, which can result in a  
249 great impact for BC concentrations in the Mt. Everest region. In event D, the high BC occurred in Nepal and some parts of  
250 India.

251 The sources and transport mechanism of BC aerosols during these pollution episodes can be indicated by analyzing the  
252 air flow. Fig. 10 shows the variation of BC concentrations and wind field at different altitudes in the atmosphere (850 hPa, 500  
253 hPa, 200 hPa). For event A during the monsoon season, there was a cyclone in northern India at 850 hPa, which moved near-  
254 surface BC aerosols upward and then transported to the Mt. Everest region by the southward winds at 500 hPa and 200 hPa.  
255 For events B-D in the pre-monsoon season, northwesterly winds prevailed in South Asia at 850 hPa and brought BC from  
256 northern India to the southern slope of the Himalayas, and westerly winds at 500 hPa and 200 hPa can transport relatively less  
257 BC from northwestern India and Central Asia to the Mt. Everest region. Previous studies also pointed out that BC can be  
258 transported across the Himalayas to the Mt. Everest region by the mountain-valley wind system (Zou et al., 2008; Cong et al.,  
259 2015b; Dhungel et al., 2018). Thus, we needed to further analyze the impact of the mountain-valley wind on the transportation  
260 of BC. Fig. 11 shows the vertical profile of BC concentration among the QOMS's longitude of 86.95°E. During event A, high  
261 concentrations of BC appeared in the upper atmosphere of South Asia and many BC aerosols were transported to most parts  
262 of the TP (Fig. 11a), due to the large-scale transport process. However, for events B-D, high concentrations of BC occurred  
263 along the southern slope of the Himalayas and BC aerosols were only transported to a few areas of the northern slope of the  
264 Himalayas such as the Mt. Everest region (Fig. 11b-d), caused by the local mountain-valley wind. As shown in Fig. S2, for  
265 events B-D, the mountain wind in the southern side of the Himalayas can move BC aerosols up in the daytime and the down  
266 valley wind can make it fall down in the Mt. Everest region at night.

267 To sum up, we found that the transport processes of BC aerosols from South Asia to the QOMS were different as seasons  
268 varying. In the monsoon season such as event A, BC aerosols were moved upward by the cyclone in the lower atmosphere and  
269 were transported to QOMS by the southward winds in the upper atmosphere. However, in the pre-monsoon season such as  
270 events B-D, the mountain-valley wind played an import role in the BC aerosols transported from the southern slope of the  
271 Himalayas to the Mt. Everest region.

#### 272 4. Conclusions

273 In this study, BC concentrations were measured from 15 May 2015 to 31 May 2017 at QOMS in the south edge of the TP,  
274 and monthly, daily, and diurnal variation of BC concentrations were calculated to investigate the temporal characteristics and  
275 potential sources of BC at QOMS. The results showed that the monthly mean BC concentrations reached the highest value in  
276 the pre-monsoon season ( $923.1 \pm 685.8 \text{ ng/m}^3$  in April) and the lowest value in the monsoon season ( $88.5 \pm 29.8 \text{ ng/m}^3$ ).



277 Average daily BC concentration was equal to  $298.8 \pm 341.3 \text{ ng/m}^3$ , with a maximum in the pre-monsoon season ( $2772.3 \text{ ng/m}^3$ )  
278 and a minimum in the monsoon season ( $36.4 \text{ ng/m}^3$ ). The diurnal variation of BC concentrations in the pre-monsoon season  
279 showed significant high values from mid-night to noon, and there was an increasing trend in the afternoon during the non-  
280 monsoon periods, implying the potential origin of BC are from the long-range transport. BC concentrations appeared two  
281 peaks in the morning and after the noon during the monsoon period, might be affected by the local anthropogenic activities.

282 The seasonal cycle of BC concentrations at QOMS was closely correlated with the variation of atmospheric circulation  
283 and combustion emissions in South Asia. In the non-monsoon seasons, affected by westerly, the air masses in the Mt. Everest  
284 region were largely from Pakistan, northern Indian, and Nepal, where exist high loading emissions of vegetation fires. In  
285 the monsoon season, the southerly winds were dominated in the Mt. Everest region and the air masses were mainly from the  
286 Arabian Sea and the Bay of Bengal. Under intense precipitation scavenging of BC and extremely low level of the combustion  
287 emissions in South Asia, BC concentrations at QOMS were close to the background level in the monsoon season.

288 For four heavy pollution episodes occurred at QOMS with BC concentrations above  $1000 \text{ ng/m}^3$ , we found that the  
289 transport processes of BC aerosols from South Asia to the Mt. Everest region were different as seasons varying. In the monsoon  
290 season (take the pollution event during 8-10 June 2015 as an example), BC aerosols were efficiently driven upward by the  
291 cyclone in the lower atmosphere in South Asia and transported to the Mt. Everest region by the southward winds in the upper  
292 atmosphere. However, during the pre-monsoon season (take the other three pollution events as example), the mountain-valley  
293 wind played an import role in the BC aerosols cross the Himalayas and were transported to the Mt. Everest region.

294 *Data availability.* All data are available upon requests made to the corresponding author.

295 *Competing interests.* The authors declare that they have no conflict of interest.

296 *Special issue statement.* This article is part of the special issue “Study of ozone, aerosols and radiation over the Tibetan Plateau  
297 (SOAR-TP) (ACP/AMT inter-journal SI)”. It is not associated with a conference.

298 *Acknowledgments.* This study was supported by the National Nature Science Foundation of China (41630754, 41675130,  
299 41421061), State Key Laboratory of Cryospheric Science (SKLCS-ZZ-2017). The authors thank the staff of the Qomolangma  
300 Atmospheric and Environmental Observation and Research Station of Chinese Academy of Sciences for collecting data and  
301 the support of meteorological dataset. We also give thanks to Tony Hansen for his suggestion on data processing and Xin Wan,  
302 Lekhendra Tripathy, and Yajun Liu for their help to improve the quality of this paper.

303

304 **References**

- 305 Anenberg, S. C., Schwartz, J., Shindell, D., Amann, M., Faluvegi, G., Klimont, Z., Janssens-Maenhout, G., Pozzoli, L., Van  
306 Dingenen, R., Vignati, E., Emberson, L., Muller, N. Z., West, J. J., Williams, M., Demkine, V., Hicks, W. K., Kuylensstierna,  
307 J., Raes, F., and Ramanathan, V.: Global air quality and health co-benefits of mitigating near-term climate change through  
308 methane and black carbon emission controls, *Environ. Health Perspect.*, 120, 831-839, <http://doi.org/10.1289/ehp.1104301>,  
309 2012.
- 310 Bonasoni, P., Laj, P., Angelini, F., Arduini, J., Bonafe, U., Calzolari, F., Cristofanelli, P., Decesari, S., Facchini, M. C., Fuzzi,  
311 S., Gobbi, G. P., Maione, M., Marinoni, A., Petzold, A., Roccatò, F., Roger, J. C., Sellegri, K., Sprenger, M., Venzac, H.,  
312 Verza, G. P., Villani, P., and Vuillermoz, E.: The ABC-Pyramid Atmospheric Research Observatory in Himalaya for aerosol,  
313 ozone and halocarbon measurements, *Sci. Total Environ.*, 391, 252-261, <http://doi.org/10.1016/j.scitotenv.2007.10.024>,  
314 2008.
- 315 Bond, T. C.: A technology-based global inventory of black and organic carbon emissions from combustion, *J. Geophys. Res.*,  
316 109, <http://doi.org/10.1029/2003jd003697>, 2004.
- 317 Bond, T. C., Doherty, S. J., Fahey, D. W., Forster, P. M., Berntsen, T., DeAngelo, B. J., Flanner, M. G., Ghan, S., Kärcher, B.,  
318 Koch, D., Kinne, S., Kondo, Y., Quinn, P. K., Sarofim, M. C., Schultz, M. G., Schulz, M., Venkataraman, C., Zhang, H.,  
319 Zhang, S., Bellouin, N., Guttikunda, S. K., Hopke, P. K., Jacobson, M. Z., Kaiser, J. W., Klimont, Z., Lohmann, U., Schwarz,  
320 J. P., Shindell, D., Storelvmo, T., Warren, S. G., and Zender, C. S.: Bounding the role of black carbon in the climate system:  
321 A scientific assessment, *J. Geophys. Res.: Atmos.*, 118, 5380-5552, <http://doi.org/10.1002/jgrd.50171>, 2013.
- 322 Cao, J., Xu, B., He, J., Liu, X., Han, Y., Wang, G., and Zhu, C.: Concentrations, seasonal variations, and transport of  
323 carbonaceous aerosols at a remote Mountainous region in western China, *Atmos. Environ.*, 43, 4444-4452,  
324 <http://doi.org/10.1016/j.atmosenv.2009.06.023>, 2009.
- 325 Chen, X., Su, Z., Ma, Y., and Sun, F.: Analysis of Land-Atmosphere Interactions over the North Region of Mt. Qomolangma  
326 (Mt. Everest), *Arct. Antarct. Alp. Res.*, 44, 412-422, 2012.
- 327 Cong, Z., Kang, S., Kawamura, K., Liu, B., Wan, X., Wang, Z., Gao, S., and Fu, P.: Carbonaceous aerosols on the south edge  
328 of the Tibetan Plateau: concentrations, seasonality and sources, *Atmos. Chem. Phys.*, 15, 1573-1584,  
329 <http://doi.org/10.5194/acp-15-1573-2015>, 2015a.
- 330 Cong, Z., Kawamura, K., Kang, S., and Fu, P.: Penetration of biomass-burning emissions from South Asia through the  
331 Himalayas: new insights from atmospheric organic acids, *Sci. Rep.*, 5, 9580, <http://doi.org/10.1038/srep09580>, 2015b.
- 332 Cooke, W. F., Ramaswamy, V., and Kasibhatla, P.: A general circulation model study of the global carbonaceous aerosol  
333 distribution, *J. Geophys. Res.: Atmos.*, 107, ACH 2-1-ACH 2-32, <http://doi.org/10.1029/2001JD001274>, 2002.
- 334 Dhungel, S., Kathayat, B., Mahata, K., and Panday, A.: Transport of regional pollutants through a remote trans-Himalayan



- 335 valley in Nepal, Atmos. Chem. Phys., 18, 1203-1216, <http://doi.org/10.5194/acp-18-1203-2018>, 2018.
- 336 Drinovec, L., Močnik, G., Zotter, P., Prévôt, A. S. H., Ruckstuhl, C., Coz, E., Rupakheti, M., Sciare, J., Müller, T., Wiedensohler,  
337 A., and Hansen, A. D. A.: The "dual-spot" Aethalometer: an improved measurement of aerosol black carbon with real-time  
338 loading compensation, Atmos. Meas. Tech., 7, 10179-10220, <http://doi.org/10.5194/amtd-7-10179-2014>, 2014.
- 339 Emmons, L. K., Walters, S., Hess, P. G., Lamarque, J. F., Pfister, G. G., Fillmore, D., Granier, C., Guenther, A., Kinnison, D.,  
340 Laepple, T., Orlando, J., Tie, X., Tyndall, G., Wiedinmyer, C., Baughcum, S. L., and Kloster, S.: Description and evaluation  
341 of the Model for Ozone and Related chemical Tracers, version 4 (MOZART-4), Geosci. Model Dev., 3, 43-67,  
342 <http://doi.org/10.5194/gmd-3-43-2010>, 2010.
- 343 Fialho, P., Hansen, A. D. A., and Honrath, R. E.: Absorption coefficients by aerosols in remote areas: a new approach to  
344 decouple dust and black carbon absorption coefficients using seven-wavelength Aethalometer data, J. Aerosol Sci., 36,  
345 267-282, <http://doi.org/10.1016/j.jaerosci.2004.09.004>, 2005.
- 346 Gao, X., Shi, Y., Song, R., Giorgi, F., Wang, Y., and Zhang, D.: Reduction of future monsoon precipitation over China:  
347 comparison between a high resolution RCM simulation and the driving GCM, Meteorol. Atmos. Phys., 100, 73-86,  
348 <http://doi.org/10.1007/s00703-008-0296-5>, 2008.
- 349 Grell, G. A., Peckham, S. E., Schmitz, R., McKeen, S. A., Frost, G., Skamarock, W. C., and Eder, B.: Fully coupled "online"  
350 chemistry within the WRF model, Atmos. Environ., 39, 6957-6975, <http://doi.org/10.1016/j.atmosenv.2005.04.027>, 2005.
- 351 Hansen, A. D. A., Rosen, H., and Novakov, T.: The aethalometer — An instrument for the real-time measurement of optical  
352 absorption by aerosol particles, Sci. Total Environ., 36, 191-196, [http://doi.org/10.1016/0048-9697\(84\)90265-1](http://doi.org/10.1016/0048-9697(84)90265-1), 1984.
- 353 Hansen, J., Sato, M., Ruedy, R., Lacis, A., and Oinas, V.: Global warming in the twenty-first century: An alternative scenario,  
354 Proc. Natl. Acad. Sci. U. S. A., 97, 9875-9880, <http://doi.org/10.1073/pnas.170278997>, 2000.
- 355 He, C., Li, Q. B., Liou, K. N., Zhang, J., Qi, L., Mao, Y., Gao, M., Lu, Z., Streets, D. G., Zhang, Q., Sarin, M. M., and Ram,  
356 K.: A global 3-D CTM evaluation of black carbon in the Tibetan Plateau, Atmos. Chem. Phys., 14, 7091-7112,  
357 <http://doi.org/10.5194/acp-14-7091-2014>, 2014.
- 358 Jacobson, M.: Control of fossil-fuel particulate black carbon and organic matter, possibly the most effective method of slowing  
359 global warming, J. Geophys. Res., 107, <http://doi.org/10.1029/2001JD001376>, 2002.
- 360 Jacobson, M. Z.: Strong radiative heating due to the mixing state of black carbon in atmospheric aerosols, Nature, 409, 695-  
361 697, <http://doi.org/10.1038/35055518>, 2001.
- 362 Ji, Z., Kang, S., Cong, Z., Zhang, Q., and Yao, T.: Simulation of carbonaceous aerosols over the Third Pole and adjacent  
363 regions: distribution, transportation, deposition, and climatic effects, Clim. Dyn., 45, 2831-2846,  
364 <http://doi.org/10.1007/s00382-015-2509-1>, 2015.
- 365 Ji, Z.: Modeling black carbon and its potential radiative effects over the Tibetan Plateau, Adv. Clim. Change. Res., 7, 139-144,  
366 <http://doi.org/10.1016/j.accre.2016.10.002>, 2016.



- 367 Jurado, E., Dachs, J., Duarte, C. M., and Simó, R.: Atmospheric deposition of organic and black carbon to the global oceans,  
368 Atmos. Environ., 42, 7931-7939, <http://doi.org/10.1016/j.atmosenv.2008.07.029>, 2008.
- 369 Kang, S., Xu, Y., You, Q., Fluegel, W.-A., Pepin, N., and Yao, T.: Review of climate and cryospheric change in the Tibetan  
370 Plateau, Environ. Res. Lett., 5, 015101, <http://doi.org/10.1088/1748-9326/5/1/015101>, 2010.
- 371 Kang, S., Chen, P., Li, C., Liu, B., and Cong, Z.: Atmospheric Aerosol Elements over the Inland Tibetan Plateau: Concentration,  
372 Seasonality, and Transport, Aerosol Air Qual. Res., 16, 789-800, <http://doi.org/10.4209/aaqr.2015.05.0307>, 2016.
- 373 Kopacz, M., Mauzerall, D. L., Wang, J., Leibensperger, E. M., Henze, D. K., and Singh, K.: Origin and radiative forcing of  
374 black carbon transported to the Himalayas and Tibetan Plateau, Atmos. Chem. Phys., 11, 2837-2852,  
375 <http://doi.org/10.5194/acp-11-2837-2011>, 2011.
- 376 Li, C., Chen, P., Kang, S., Yan, F., Hu, Z., Qu, B., and Sillanpää, M.: Concentrations and light absorption characteristics of  
377 carbonaceous aerosol in PM 2.5 and PM 10 of Lhasa city, the Tibetan Plateau, Atmos. Environ., 127, 340-346,  
378 <http://doi.org/10.1016/j.atmosenv.2015.12.059>, 2016.
- 379 Li, J. J., Wang, H. G., Wang, M. X., Cao, J. J., Sun, T., Cheng, C. L., Meng, J. J., Hu, T. F., and Liu, X. s.: Abundance,  
380 composition and source of atmospheric PM<sub>2.5</sub> at a remote site in the Tibetan Plateau, China, Tellus Ser. B-Chem. Phys.  
381 Meteorol., 65, 20281, <http://doi.org/10.3402/tellusb.v65i0.20281>, 2013.
- 382 Li, X., Kang, S., He, X., Qu, B., Tripathee, L., Jing, Z., Paudyal, R., Li, Y., Zhang, Y., Yan, F., Li, G., and Li, C.: Light-  
383 absorbing impurities accelerate glacier melt in the Central Tibetan Plateau, Sci. Total Environ., 587, 482-490,  
384 <http://doi.org/10.1016/j.scitotenv.2017.02.169>, 2017.
- 385 Li, X., Kang, S., Zhang, G., Qu, B., Tripathee, L., Paudyal, R., Jing, Z., Zhang, Y., Yan, F., Li, G., Cui, X., Xu, R., Hu, Z., and  
386 Li, C.: Light-absorbing impurities in a southern Tibetan Plateau glacier: Variations and potential impact on snow albedo  
387 and radiative forcing, Atmos. Res., 200, 77-87, <http://doi.org/10.1016/j.atmosres.2017.10.002>, 2018.
- 388 Lu, A., Kang, S., Li, Z., and Theakstone, W. H.: Altitude effects of climatic variation on Tibetan Plateau and its vicinities, J.  
389 Earth Sci., 21, 189-198, <http://doi.org/10.1007/s12583-010-0017-0>, 2010.
- 390 Lu, Z., Streets, D. G., Zhang, Q., and Wang, S.: A novel back-trajectory analysis of the origin of black carbon transported to  
391 the Himalayas and Tibetan Plateau during 1996-2010, Geophys. Res. Lett., 39, L01809,  
392 <http://doi.org/10.1029/2011gl049903>, 2012.
- 393 Luthi, Z. L., Skerlak, B., Kim, S. W., Lauer, A., Mues, A., Rupakheti, M., and Kang, S.: Atmospheric brown clouds reach the  
394 Tibetan Plateau by crossing the Himalayas, Atmos. Chem. Phys., 15, 6007-6021, <http://doi.org/10.5194/acp-15-6007-2015>,  
395 2015.
- 396 Ma, Y., Wang, Y., Zhong, L., Wu, R., Wang, S., and Li, M.: The Characteristics of Atmospheric Turbulence and Radiation  
397 Energy Transfer and the Structure of Atmospheric Boundary Layer over the Northern Slope Area of Himalaya, J. Meteorol.  
398 Soc. Jpn., 89A, 345-353, <http://doi.org/10.2151/jmsj.2011-A24>, 2011.



- 399 Marinoni, A., Cristofanelli, P., Laj, P., Duchi, R., Calzolari, F., Decesari, S., Sellegri, K., Vuillermoz, E., Verza, G. P., Villani,  
400 P., and Bonasoni, P.: Aerosol mass and black carbon concentrations, a two year record at NCO-P (5079 m, Southern  
401 Himalayas), *Atmos. Chem. Phys.*, 10, 8551-8562, <http://doi.org/10.5194/acp-10-8551-2010>, 2010.
- 402 Menon, S., Koch, D., Beig, G., Sahu, S., Fasullo, J., and Orlikowski, D.: Black carbon aerosols and the third polar ice cap,  
403 *Atmos. Chem. Phys.*, 10, 4559-4571, <http://doi.org/10.5194/acp-10-4559-2010>, 2010.
- 404 Ming, J., Cachier, H., Xiao, C., Qin, D., Kang, S., Hou, S., and Xu, J.: Black carbon record based on a shallow Himalayan ice  
405 core and its climatic implications, *Atmos. Chem. Phys.*, 8, 1343-1352, <http://doi.org/10.5194/acp-8-1343-2008>, 2008.
- 406 Oshima, N., Kondo, Y., Moteki, N., Takegawa, N., Koike, M., Kita, K., Matsui, H., Kajino, M., Nakamura, H., Jung, J. S., and  
407 Kim, Y. J.: Wet removal of black carbon in Asian outflow: Aerosol Radiative Forcing in East Asia (A-FORCE) aircraft  
408 campaign, *J. Geophys. Res.*, 117, D03204, <http://doi.org/10.1029/2011jd016552>, 2012.
- 409 Praveen, P. S., Ahmed, T., Kar, A., Rehman, I. H., and Ramanathan, V.: Link between local scale BC emissions and large scale  
410 atmospheric solar absorption, *Atmos. Chem. Phys.*, 12, 1173-1187, <http://doi.org/10.5194/acp-12-1173-2012>, 2012.
- 411 Qu, B., Ming, J., Kang, S.-C., Zhang, G.-S., Li, Y.-W., Li, C.-D., Zhao, S.-Y., Ji, Z.-M., and Cao, J.-J.: The decreasing albedo  
412 of Zhadang glacier on western Nyainqentanglha and the role of light-absorbing impurities, *Atmos. Chem. Phys.*, 14, 11117-  
413 11128, <http://doi.org/10.5194/acp-14-11117-2014>, 2014.
- 414 Ram, K., Sarin, M. M., and Hegde, P.: Long-term record of aerosol optical properties and chemical composition from a high-  
415 altitude site (Manora Peak) in Central Himalaya, *Atmos. Chem. Phys.*, 10, 11791-11803, <http://doi.org/10.5194/acp-10-11791-2010>, 2010.
- 417 Ramanathan, V., Chung, C., Kim, D., Bettge, T., Buja, L., Kiehl, J. T., Washington, W. M., Fu, Q., Sikka, D. R., and Wild, M.:  
418 Atmospheric brown clouds: impacts on South Asian climate and hydrological cycle, *P. Natl. Acad. Sci. USA*, 102, 5326-  
419 5333, <http://doi.org/10.1073/pnas.0500656102>, 2005.
- 420 Ramanathan, V., and Ramana, M. V.: Persistent, Widespread, and Strongly Absorbing Haze Over the Himalayan Foothills and  
421 the Indo-Gangetic Plains, *Pure appl. geophys.*, 162, 1609-1626, <http://doi.org/10.1007/s00024-005-2685-8>, 2005.
- 422 Ramanathan, V., and Carmichael, G.: Global and Regional Climate Changes Due to Black Carbon, *Nature Geosci.*, 1, 221-227,  
423 <http://doi.org/10.1038/ngeo156>, 2008.
- 424 Sandradewi, J., Prevot, A., Szidat, S., Perron, N., Alfarra, M., A Lanz, V., Weingartner, E., and Baltensperger, U.: Using aerosol  
425 light absorption measurements for the quantitative determination of wood burning and traffic emission contributions to  
426 particulate matter, *Environ. Sci. Technol.*, 42, 3316-3323, <http://doi.org/10.1021/es702253m>, 2008a.
- 427 Sandradewi, J., Prevot, A., Weingartner, E., Schmidhauser, R., Gysel, M., and Baltensperger, U.: A study of wood burning and  
428 traffic aerosols in an Alpine valley using a multi-wavelength Aethalometer, *Atmos. Environ.*, 42, 101-112,  
429 <http://doi.org/10.1016/j.atmosenv.2007.09.034>, 2008b.
- 430 Skamarock, W. C., Klemp, J. B., Dudhia, J., Gill, D. O., Barker, D. M., Wang, W., and Powers, J. G.: A Description of the



- 431 Advanced Research WRF Version 2, NCAR Technical Note NCAR/TN-468+STR, <http://doi.org/doi:10.5065/D6DZ069T>,  
432 2005.
- 433 Tripathee, L., Kang, S., Rupakheti, D., Cong, Z., Zhang, Q., and Huang, J.: Chemical characteristics of soluble aerosols over  
434 the central Himalayas: insights into spatiotemporal variations and sources, *Environ. Sci. Pollut. Res.*, 24, 24454-24472,  
435 <http://doi.org/10.1007/s11356-017-0077-0>, 2017.
- 436 Vadrevu, K. P., Ellicott, E., Giglio, L., Badarinath, K. V. S., Vermote, E., Justice, C., and Lau, W. K. M.: Vegetation fires in the  
437 himalayan region – Aerosol load, black carbon emissions and smoke plume heights, *Atmos. Environ.*, 47, 241-251,  
438 <http://doi.org/10.1016/j.atmosenv.2011.11.009>, 2012.
- 439 Wan, X., Kang, S., Wang, Y., Xin, J., Liu, B., Guo, Y., Wen, T., Zhang, G., and Cong, Z.: Size distribution of carbonaceous  
440 aerosols at a high-altitude site on the central Tibetan Plateau (Nam Co Station, 4730ma.s.l.), *Atmos. Res.*, 153, 155-164,  
441 <http://doi.org/10.1016/j.atmosres.2014.08.008>, 2015.
- 442 Wang, M., Xu, B., Wang, N., Cao, J., Tie, X., Wang, H., Zhu, C., and Yang, W.: Two distinct patterns of seasonal variation of  
443 airborne black carbon over Tibetan Plateau, *Sci. Total Environ.*, 573, 1041-1052,  
444 <http://doi.org/10.1016/j.scitotenv.2016.08.184>, 2016.
- 445 Wiedinmyer, C., Akagi, S. K., Yokelson, R. J., Emmons, L. K., Al-Saadi, J. A., Orlando, J. J., and Soja, A. J.: The Fire  
446 INventory from NCAR (FINN): a high resolution global model to estimate the emissions from open burning, *Geosci.  
447 Model Dev.*, 4, 625-641, <http://doi.org/10.5194/gmd-4-625-2011>, 2011.
- 448 Wu, G., Xu, B., Zhang, C., and Gao, S.: Atmospheric dust aerosols over the Eastern Pamirs: major element concentrations and  
449 composition, *Environ. Earth Sci.*, 61, 1227-1237, <http://doi.org/10.1007/s12665-009-0446-1>, 2010.
- 450 Xu, B.-Q., Wang, M., Joswiak, D. R., Cao, J.-J., Yao, T.-D., Wu, G.-J., Yang, W., and Zhao, H.-B.: Deposition of anthropogenic  
451 aerosols in a southeastern Tibetan glacier, *J. Geophys. Res.*, 114, D17209, <http://doi.org/10.1029/2008JD011510>, 2009.
- 452 Xu, C., Ma, Y. M., Panday, A., Cong, Z. Y., Yang, K., Zhu, Z. K., Wang, J. M., Amatya, P. M., and Zhao, L.: Similarities and  
453 differences of aerosol optical properties between southern and northern sides of the Himalayas, *Atmos. Chem. Phys.*, 14,  
454 3133-3149, <http://doi.org/10.5194/acp-14-3133-2014>, 2014.
- 455 Xu, Y., Ramanathan, V., and Washington, W. M.: Observed high-altitude warming and snow cover retreat over Tibet and the  
456 Himalayas enhanced by black carbon aerosols, *Atmos. Chem. Phys.*, 16, 1303-1315, [http://doi.org/10.5194/acp-16-1303-](http://doi.org/10.5194/acp-16-1303-2016)  
457 2016, 2016.
- 458 Yang, J., Duan, K., Kang, S., Shi, P., and Ji, Z.: Potential feedback between aerosols and meteorological conditions in a heavy  
459 pollution event over the Tibetan Plateau and Indo-Gangetic Plain, *Clim. Dyn.*, 48, 2901-2917,  
460 <http://doi.org/10.1007/s00382-016-3240-2>, 2017.
- 461 Yang, J., Kang, S., Ji, Z., and Chen, D.: Modeling the Origin of Anthropogenic Black Carbon and Its Climatic Effect Over the  
462 Tibetan Plateau and Surrounding Regions, *J. Geophys. Res.: Atmos.*, n/a-n/a, <http://doi.org/10.1002/2017JD027282>, 2018.



- 463 Yang, M., Howell, S. G., Zhuang, J., and Huebert, B. J.: Attribution of aerosol light absorption to black carbon, brown carbon,  
464 and dust in China - interpretations of atmospheric measurements during EAST-AIRE, Atmos. Chem. Phys., 9, 2035-2050,  
465 <http://doi.org/10.5194/acp-9-2035-2009>, 2009.
- 466 Yang, S., Xu, B., Cao, J., Zender, C. S., and Wang, M.: Climate effect of black carbon aerosol in a Tibetan Plateau glacier,  
467 Atmos. Environ., 111, 71-78, <http://doi.org/10.1016/j.atmosenv.2015.03.016>, 2015.
- 468 Yao, T., Thompson, L. G., Mosbrugger, V., Zhang, F., Ma, Y., Luo, T., Xu, B., Yang, X., Joswiak, D. R., Wang, W., Joswiak,  
469 M. E., Devkota, L. P., Tayal, S., Jilani, R., and Fayziev, R.: Third Pole Environment (TPE), Environ. Dev., 3, 52-64,  
470 <http://doi.org/10.1016/j.envdev.2012.04.002>, 2012.
- 471 Yasunari, T. J., Bonasoni, P., Laj, P., Fujita, K., Vuillermoz, E., Marinoni, A., Cristofanelli, P., Duchi, R., Tartari, G., and Lau,  
472 K. M.: Estimated impact of black carbon deposition during pre-monsoon season from Nepal Climate Observatory –  
473 Pyramid data and snow albedo changes over Himalayan glaciers, Atmos. Chem. Phys., 10, 6603-6615,  
474 <http://doi.org/10.5194/acp-10-6603-2010>, 2010.
- 475 Zhang, Q., Streets, D. G., Carmichael, G. R., He, K. B., Huo, H., Kannari, A., Klimont, Z., Park, I. S., Reddy, S., Fu, J. S.,  
476 Chen, D., Duan, L., Lei, Y., Wang, L. T., and Yao, Z. L.: Asian emissions in 2006 for the NASA INTEX-B mission, Atmos.  
477 Chem. Phys., 9, 5131-5153, <http://doi.org/10.5194/acp-9-5131-2009>, 2009.
- 478 Zhang, R., Wang, H., Qian, Y., Rasch, P. J., Easter, R. C., Ma, P. L., Singh, B., Huang, J., and Fu, Q.: Quantifying sources,  
479 transport, deposition, and radiative forcing of black carbon over the Himalayas and Tibetan Plateau, Atmos. Chem. Phys.,  
480 15, 6205-6223, <http://doi.org/10.5194/acp-15-6205-2015>, 2015.
- 481 Zhang, X., Ming, J., Li, Z., Wang, F., and Zhang, G.: The online measured black carbon aerosol and source orientations in the  
482 Nam Co region, Tibet, Environ. Sci. Pollut. Res., 24, 25021-25033, <http://doi.org/10.1007/s11356-017-0165-1>, 2017a.
- 483 Zhang, Y., Kang, S., Cong, Z., Schmale, J., Sprenger, M., Li, C., Yang, W., Gao, T., Sillanpää, M., Li, X., Liu, Y., Chen, P., and  
484 Zhang, X.: Light-absorbing impurities enhance glacier albedo reduction in the southeastern Tibetan plateau, J. Geophys.  
485 Res.: Atmos., 122, 6915-6933, <http://doi.org/10.1002/2016JD026397>, 2017b.
- 486 Zhao, S., Ming, J., Xiao, C., Sun, W., and Qin, X.: A preliminary study on measurements of black carbon in the atmosphere of  
487 northwest Qilian Shan, J. Environ. Sci., 24, 152-159, [http://doi.org/10.1016/s1001-0742\(11\)60739-0](http://doi.org/10.1016/s1001-0742(11)60739-0), 2012.
- 488 Zou, H., Zhou, L., Ma, S., Li, P., Wang, W., Li, A., Jia, J., and Gao, D.: Local wind system in the Rongbuk Valley on the  
489 northern slope of Mt. Everest, Geophys. Res. Lett., 35, L13813, <http://doi.org/10.1029/2008gl033466>, 2008.
- 490



491 **Table 1. Mean BC concentrations at QOMS and compared with other remote sites.**

| Name                  | Location                                         | Sample | Sampling period   | BC or EC (ng/m <sup>3</sup> ) | Reference              |
|-----------------------|--------------------------------------------------|--------|-------------------|-------------------------------|------------------------|
| QOMS                  | Southern TP<br>(28.36°N, 86.95°E, 4276m)         | AE33   | May 2015-Apr 2016 | 298.8 ± 341.3                 | This paper             |
| QOMS                  | Southern TP<br>(28.36°N, 86.95°E, 4276m)         | TSP    | Aug 2009-Jul 2010 | 250 ± 220                     | Cong et al. (2015)     |
| Ranwu                 | Southeast TP<br>(29.32°N, 96.96°E, 4600m)        | AE31   | Nov 2012-Jun 2013 | 139.1                         | Wang et al. (2016)     |
| Lhasa                 | Southwest TP<br>(29.65°N, 91.03°E, 3642m)        | PM 10  | May 2013-Mar 2014 | 2310                          | Li et al. (2016)       |
| Nam Co                | Central TP<br>(30.46°N, 90.59°E, 4730m)          | TSP    | Jan-Dec 2012      | 190                           | Wan et al. (2015)      |
| Qilianshan            | Northern TP<br>(39.50°N, 96.51°E, 4214m)         | AE31   | May 2009-Mar 2011 | 48                            | Zhao et al. (2012)     |
| Qinghai Lake          | Northeast TP<br>(37.00°N, 99.90°E, 3200m)        | PM 2.5 | Jul-Aug 2010      | 370                           | Li et al. (2013)       |
| Muztagh Ata           | Northwest TP<br>(38.29°N, 75.02°E, 4500m)        | TSP    | Dec 2003-Feb 2006 | 55                            | Cao et al. (2009)      |
| NCO-P, Nepal          | Southern Himalayas<br>(27.95°N, 86.82°E, 5079m)  | PM 1   | Mar 2006-Feb 2008 | 160.5 ± 296.1                 | Marinoni et al. (2010) |
| Manora Peak,<br>India | Central Himalayas<br>(29.40° N, 79.50° E, 1950m) | TSP    | Feb 2005–Jul 2008 | In the range of<br>140-7600   | Ram et al. (2010)      |

492

493

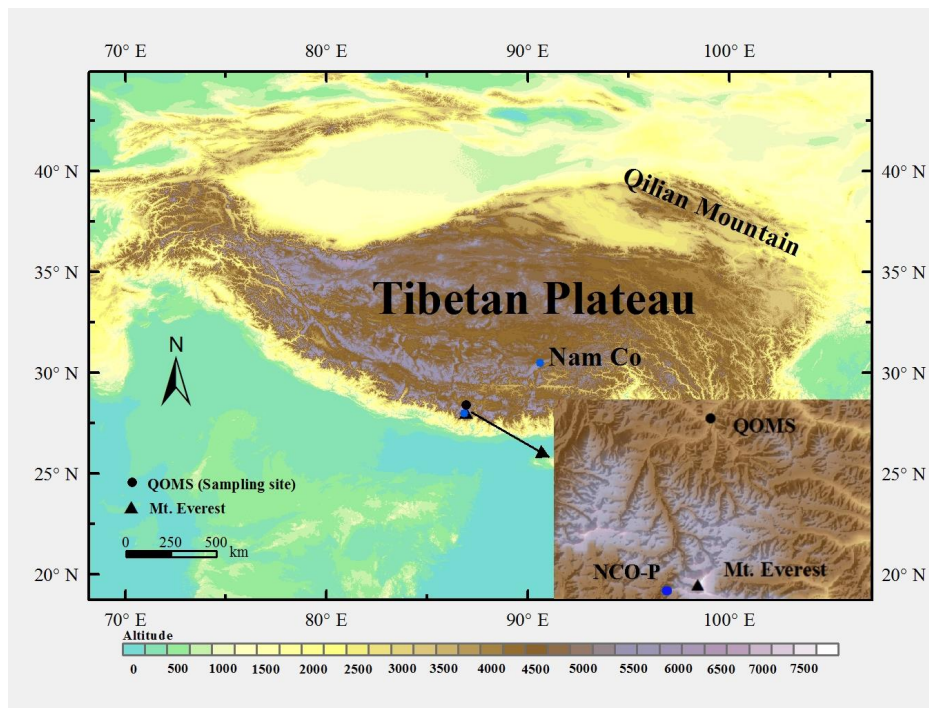

494

495 **Figure 1: Location of the sampling site.**

496

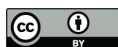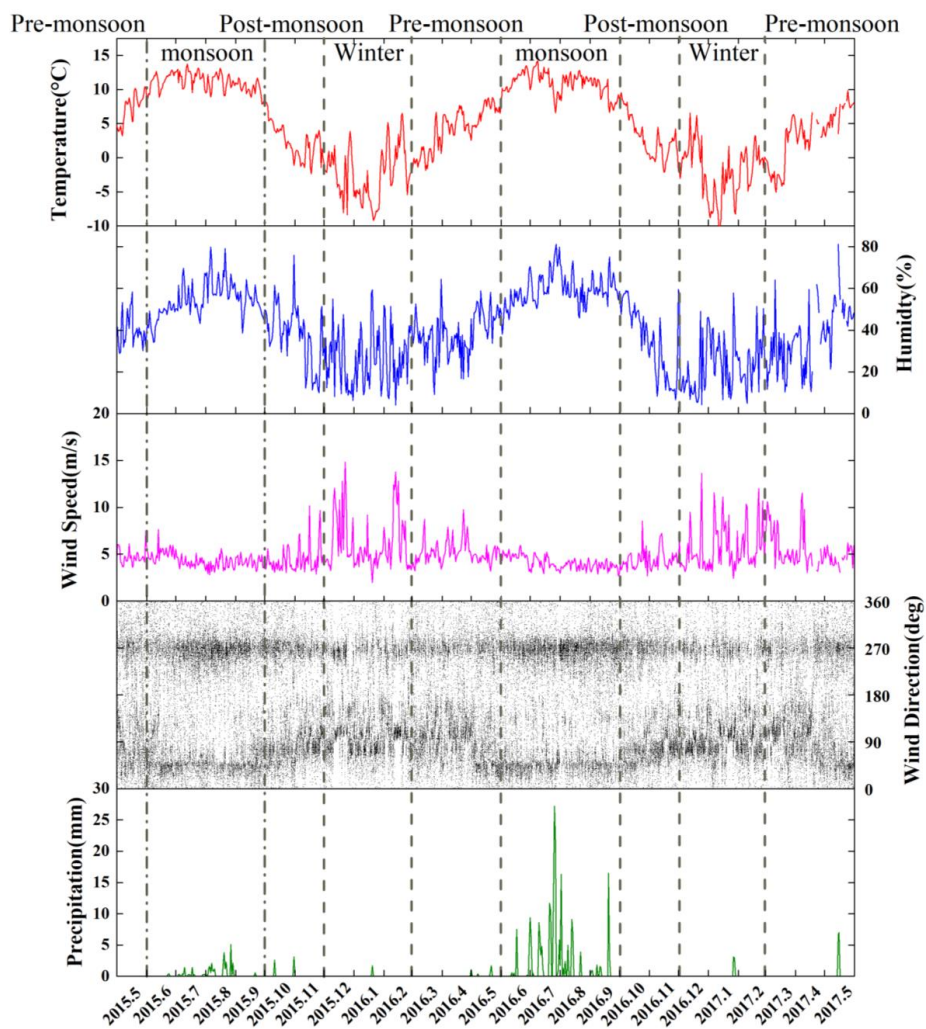

497

498 Figure 2: Variations of temperature, humidity, wind speed, wind direction, and precipitation at QOMS from May 2015 to May 2017.

499

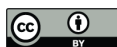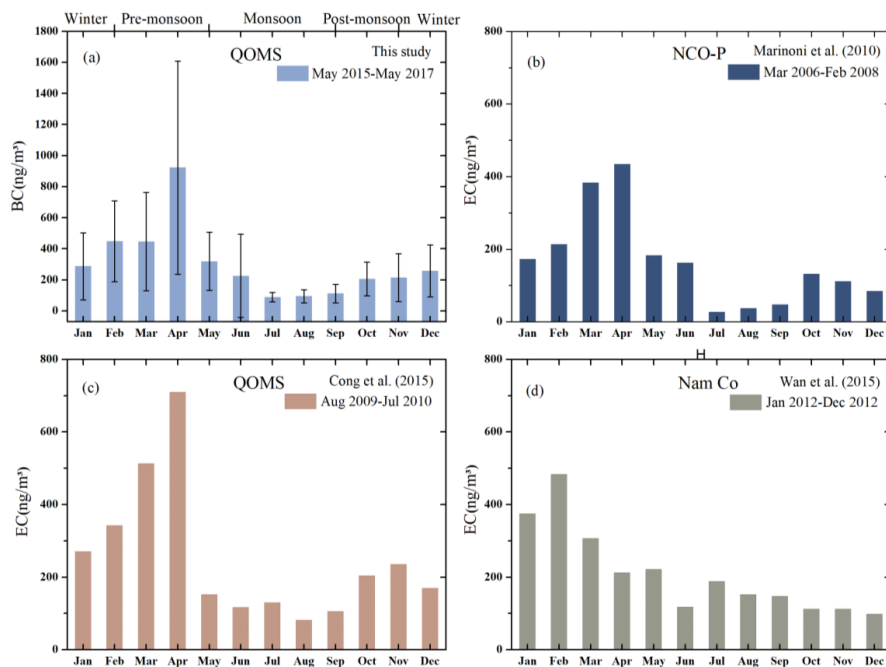

500

501 **Figure 3:** (a) Monthly mean BC concentrations at QOMS from May 2015 to May 2017 in this study; (b) Monthly mean EC at NCO-  
502 **P** from March 2006 to February 2008 from Marinoni et al. (2010); (c) Monthly mean EC at QOMS from August 2009 to July 2010  
503 from Cong et al. (2015); (d) Monthly mean EC at Nam Co station from January to December 2012 from Wan et al. (2015).

504

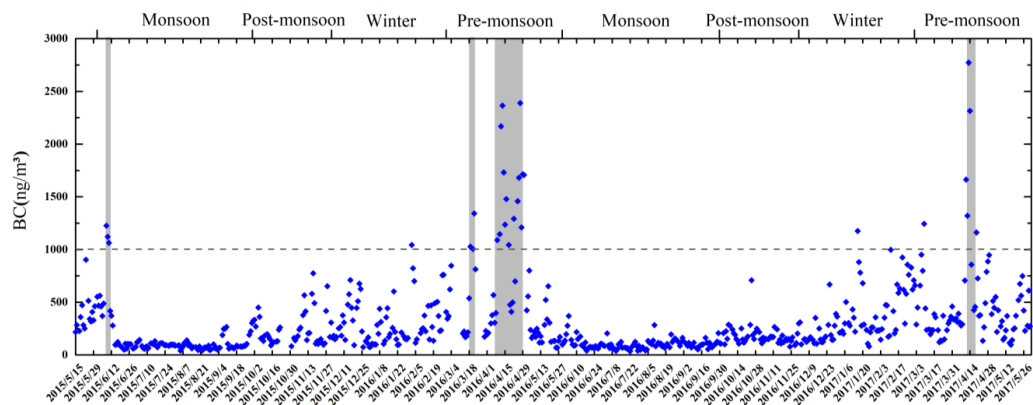

505

506 **Figure 4: Daily mean BC concentrations at QOMS during study period (the gray bars represent the continuous high values more**  
507 **than 1000 ng/m<sup>3</sup>).**

508

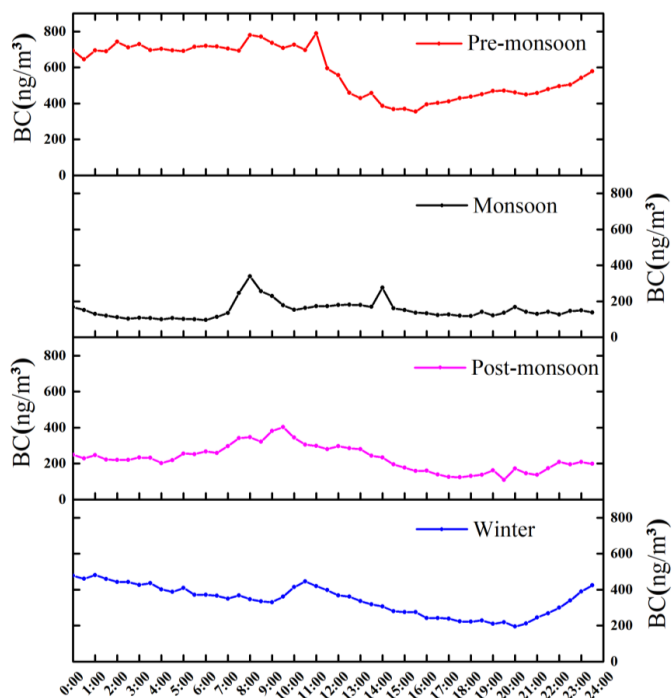

509

510 **Figure 5: Diurnal variation of BC concentrations (every half an hour) at QOMS during study period.**

511

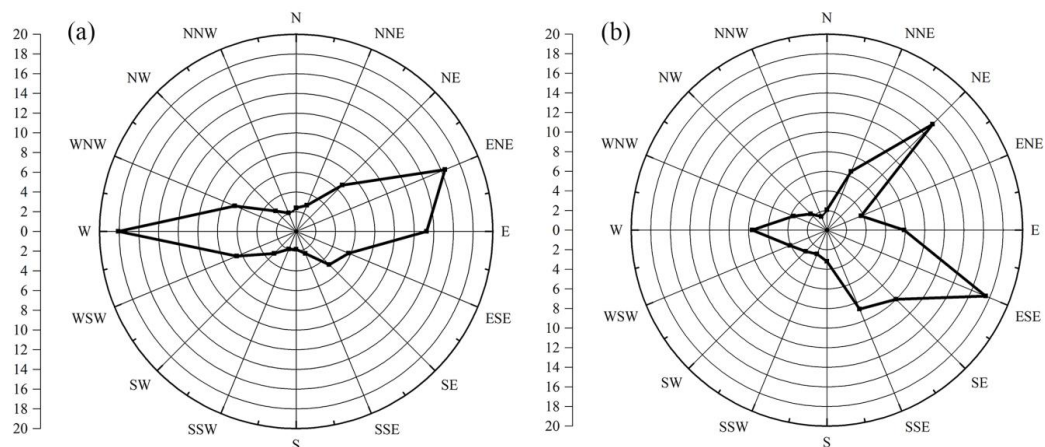

512

513 **Figure 6. Wind direction frequency at QOMS in the pre-monsoon season (a) 0:00-12:00; (b) 12:00-24:00.**

514

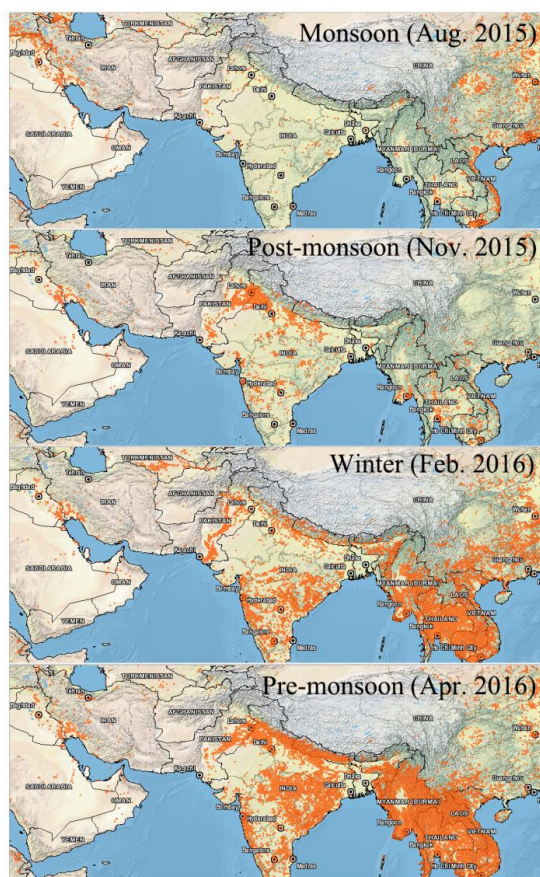

515

516 **Figure 7. The distribution of fire spots in different seasons from August 2015 to April 2016.**

517



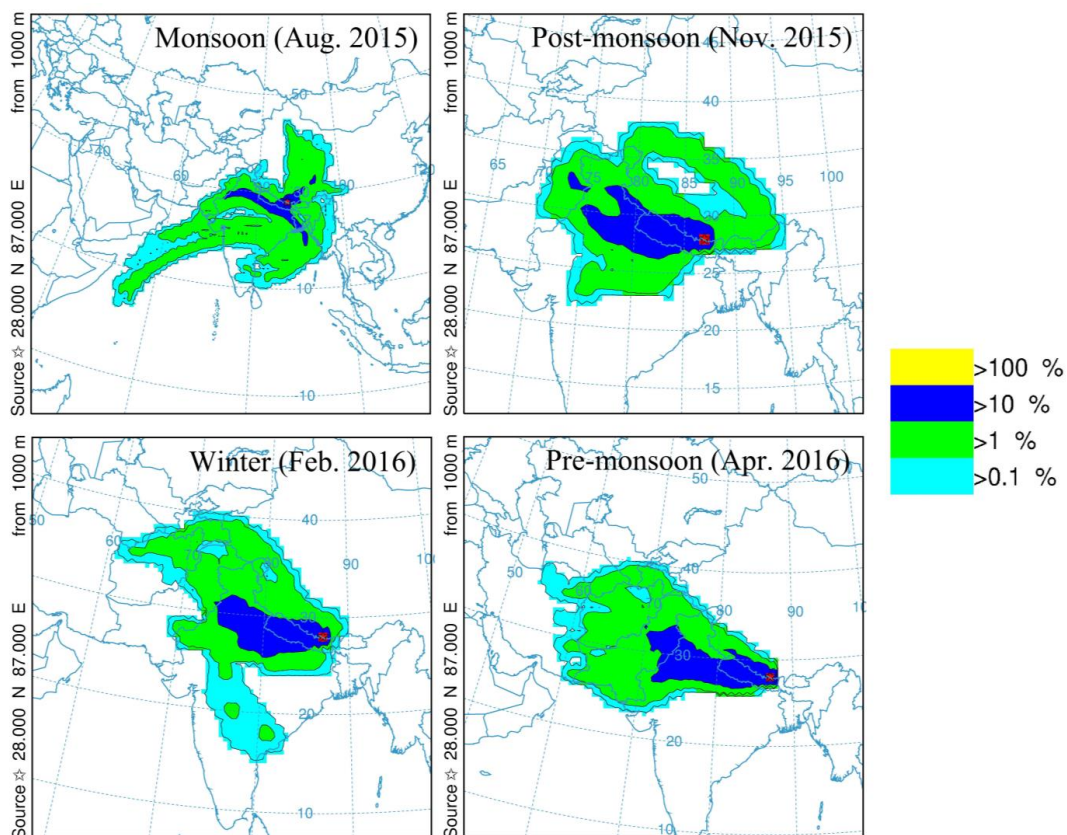

518

519 **Figure 8.** Frequency plots for 5-day back trajectories calculated by HYSPLIT model at QOMS in different seasons from August  
520 2015 to April 2016.

521

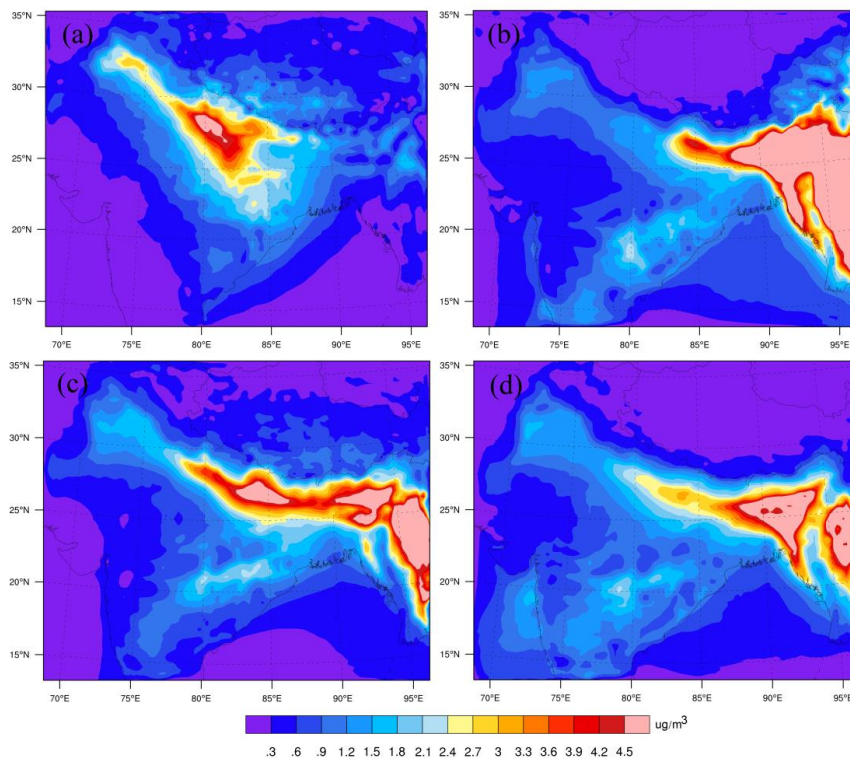

522

523 **Figure 9. Mean BC concentration simulated by WRF-Chem model at QOMS and its vicinities: (a) event A; (b) event B; (c) event C;**

524 **(d) event D.**

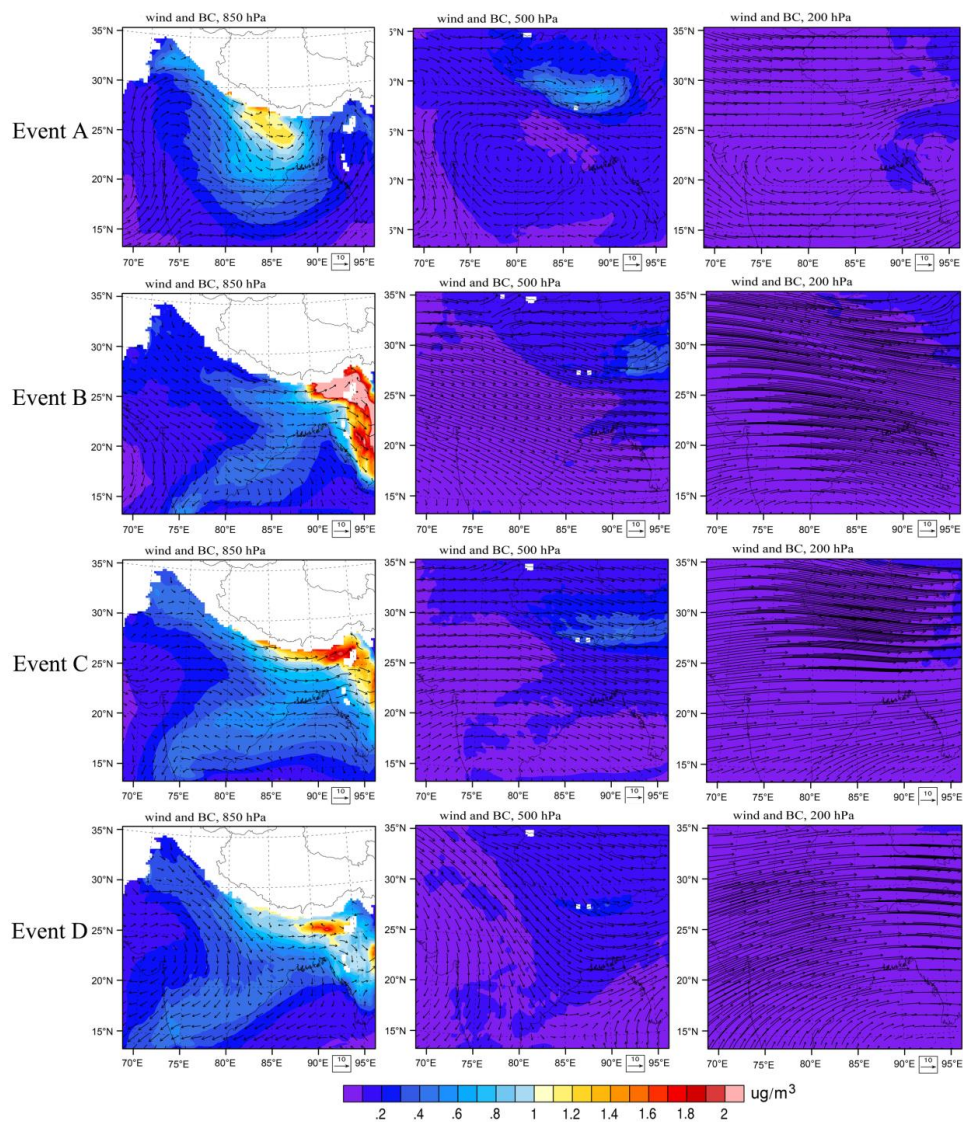

525

526 **Figure 10.** Mean BC concentration and wind at 850 hpa, 500 hpa, and 200 hpa simulated by WRF-Chem model at QOMS and its  
527 vicinities: event A (the first row); event B (the second row); event C (the third row); event D (the last row).

528

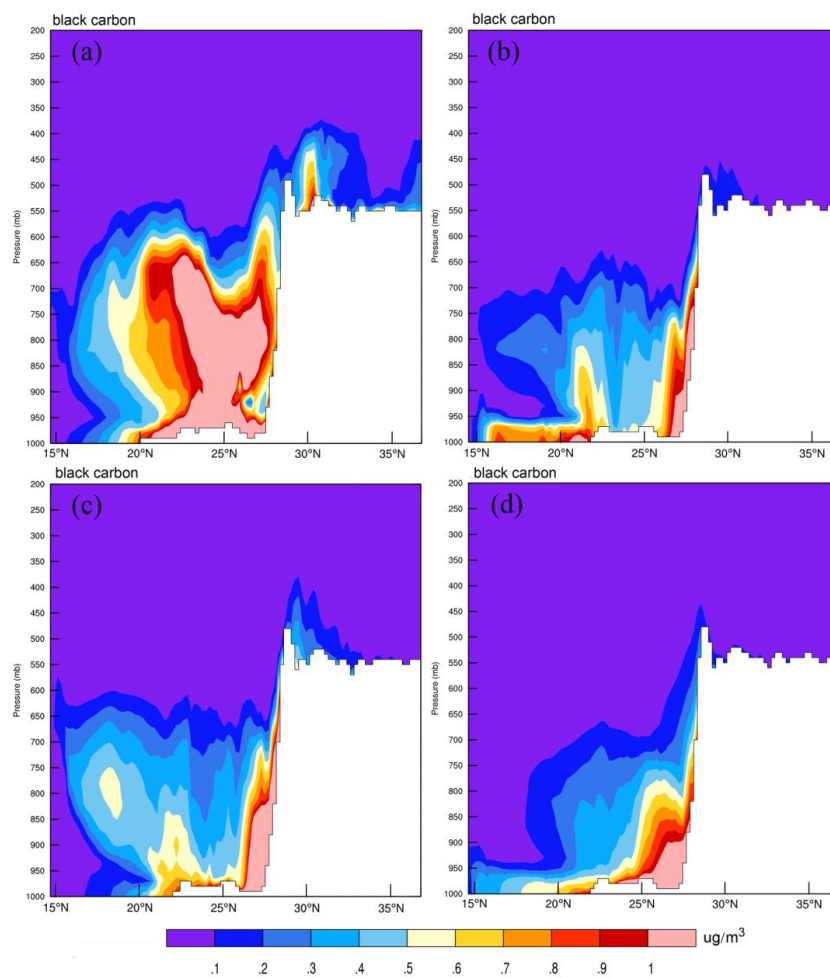

529

530 **Figure 11. Vertical profiles of mean BC concentration among the QOMS's longitude of 86.95°E: (a) event A; (b) event B; (c) event**  
 531 **C; (d) event D.**

532

533
