# Supplementary material for: Concentration, temporal variation and sources of black carbon in the Mount Everest region retrieved by real-time observation and simulation
Source: Copernicus journal article supplement (doi:10.5194/acp-2018-183), 2018-03-09
Supplement: Supplementary file [file Concentration,temporal variation and sources of black carbon in the Mount Everest region retrieved by real-time observation and simulation-Supplement.pdf › Concentration,temporal variation and sources of black carbon in the Mount Everest region retrieved by real-time observation and simulation-Supplement.pdf]

***Supplement of***

**Concentration, temporal variation and sources of black carbon in the Mount Everest region retrieved by real-time observation and simulation**

Xintong Chen <sup>1, 4</sup>, Shichang Kang <sup>1, 2, 4</sup>, Zhiyuan Cong<sup>2, 3</sup>, Junhua Yang <sup>1</sup>, Yaoming Ma <sup>3</sup>

5 <sup>1</sup>State Key Laboratory of Cryospheric Science, Northwest Institute of Eco-Environment and Resources, Chinese Academy of Sciences, Lanzhou 730000, China

<sup>2</sup>CAS Center for Excellence in Tibetan Plateau Earth Sciences, Chinese Academy of Sciences, Beijing 100101, China

<sup>3</sup>Key Laboratory of Tibetan Environment Changes and Land Surface Processes, Institute of Tibetan Plateau Research, Chinese Academy of Sciences, Beijing 100101, China

10 <sup>4</sup>University of Chinese Academy of Sciences, Beijing 100049, China

*Correspondence to:* Shichang Kang (shichang.kang@lzb.ac.cn)

**Table S1. Mean BC concentration at QOMS and compared with other remote sites.**

| Name                  | Location                                            | Sample            | Sampling period   | BC or EC (ng/m <sup>3</sup> ) | Reference              |
|-----------------------|-----------------------------------------------------|-------------------|-------------------|-------------------------------|------------------------|
| QOMS                  | Southern TP<br>(28.36°N, 86.95°E,<br>4276m)         | AE-33             | May 2015-May 2017 | 298.8 ± 341.3                 | This paper             |
| QOMS                  | Southern TP<br>(28.36°N, 86.95°E,<br>4276m)         | TSP               | Aug 2009-Jul 2010 | 250 ± 220                     | Cong et al. (2015a)    |
| Lhasa                 | Southern TP<br>(29.65°N, 91.03°E,<br>3642m)         | PM <sub>10</sub>  | May 2013-Mar 2014 | 2310                          | Li et al. (2016b)      |
| Ranwu                 | Southeast TP<br>(29.32°N, 96.96°E,<br>4600m)        | AE-31             | Nov 2012-Jun 2013 | 139.1                         | Wang et al. (2016)     |
| Nam Co                | Central TP<br>(30.77°N, 90.98°E,<br>4730m)          | TSP               | Jan-Dec 2012      | 190                           | Wan et al. (2015)      |
| Qilian Shan           | Northern TP<br>(39.50°N, 96.50°E,<br>4214m)         | AE-31             | May 2009-Mar 2011 | 48                            | Zhao et al. (2012)     |
| Beiluhe               | Northern TP<br>(34.85°N, 92.94°E,<br>4600m)         | AE-31             | Nov 2012-Jun 2013 | 413.2                         | Wang et al. (2016)     |
| Qinghai<br>Lake       | Northeast TP<br>(37.00°N, 99.90°E,<br>3200m)        | PM <sub>2.5</sub> | Jul-Aug 2010      | 370                           | Li et al. (2013)       |
| Muztagh Ata           | Northwest TP<br>(38.29°N, 75.02°E,<br>4500m)        | TSP               | Dec 2003-Feb 2006 | 55                            | Cao et al. (2009)      |
| Manora<br>Peak, India | Central Himalayas<br>(29.40° N, 79.50° E,<br>1950m) | TSP               | Feb 2005–Jul 2008 | In the range of<br>140-7600   | Ram et al. (2010)      |
| NCO-P,<br>Nepal       | Southern Himalayas<br>(27.95°N, 86.82°E,<br>5079m)  | PM <sub>1</sub>   | Mar 2006-Feb 2008 | 160.5 ±296.1                  | Marinoni et al. (2010) |

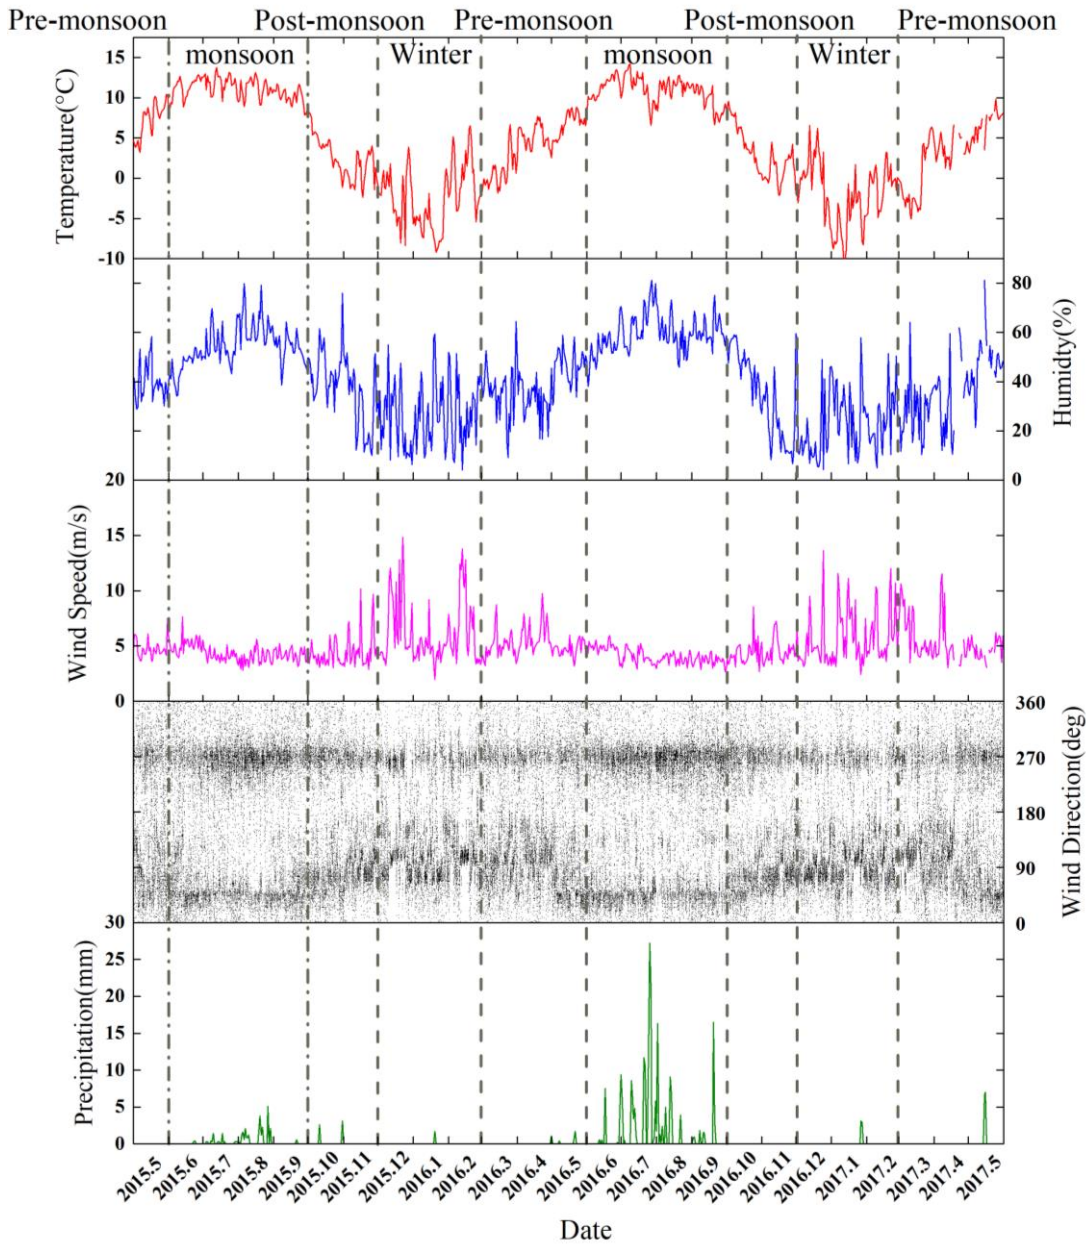

**Figure S1.** Variations of temperature, humidity, wind speed, wind direction, and precipitation at QOMS from May 2015 to May 2017.

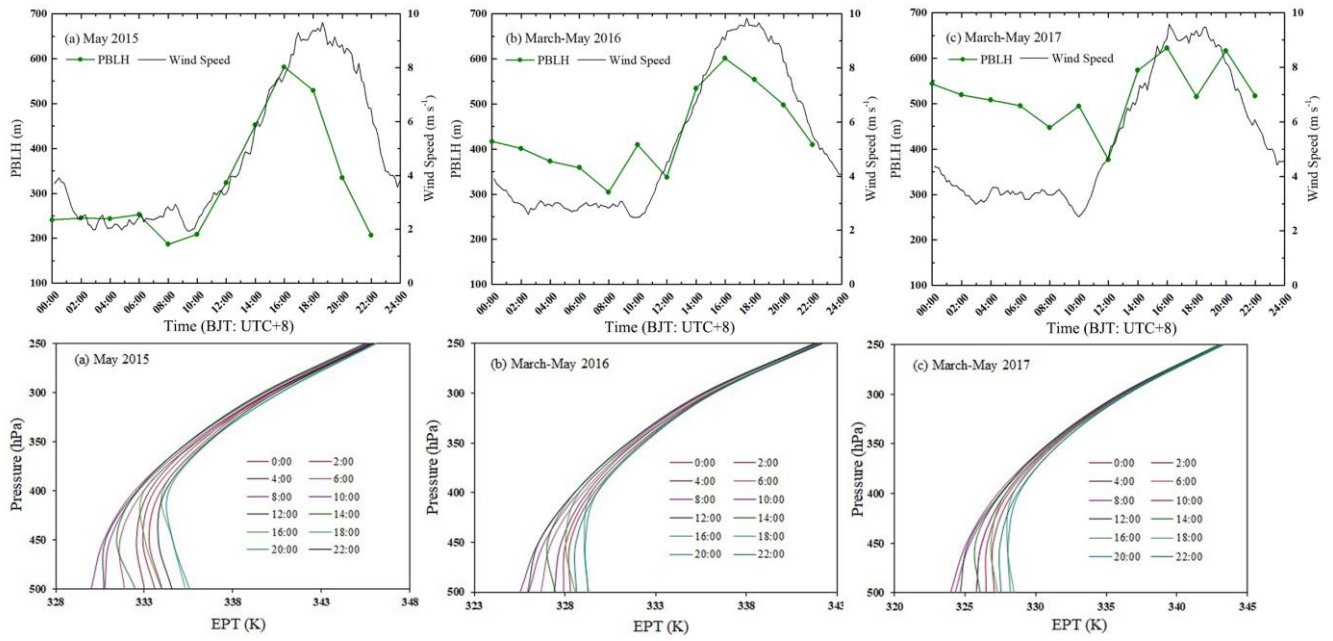

**Figure S2.** Diurnal variation in planetary boundary layer height (the first row) and the vertical profile of distribution of equivalent potential temperature (the second row) at QOMS in the pre-monsoon season.

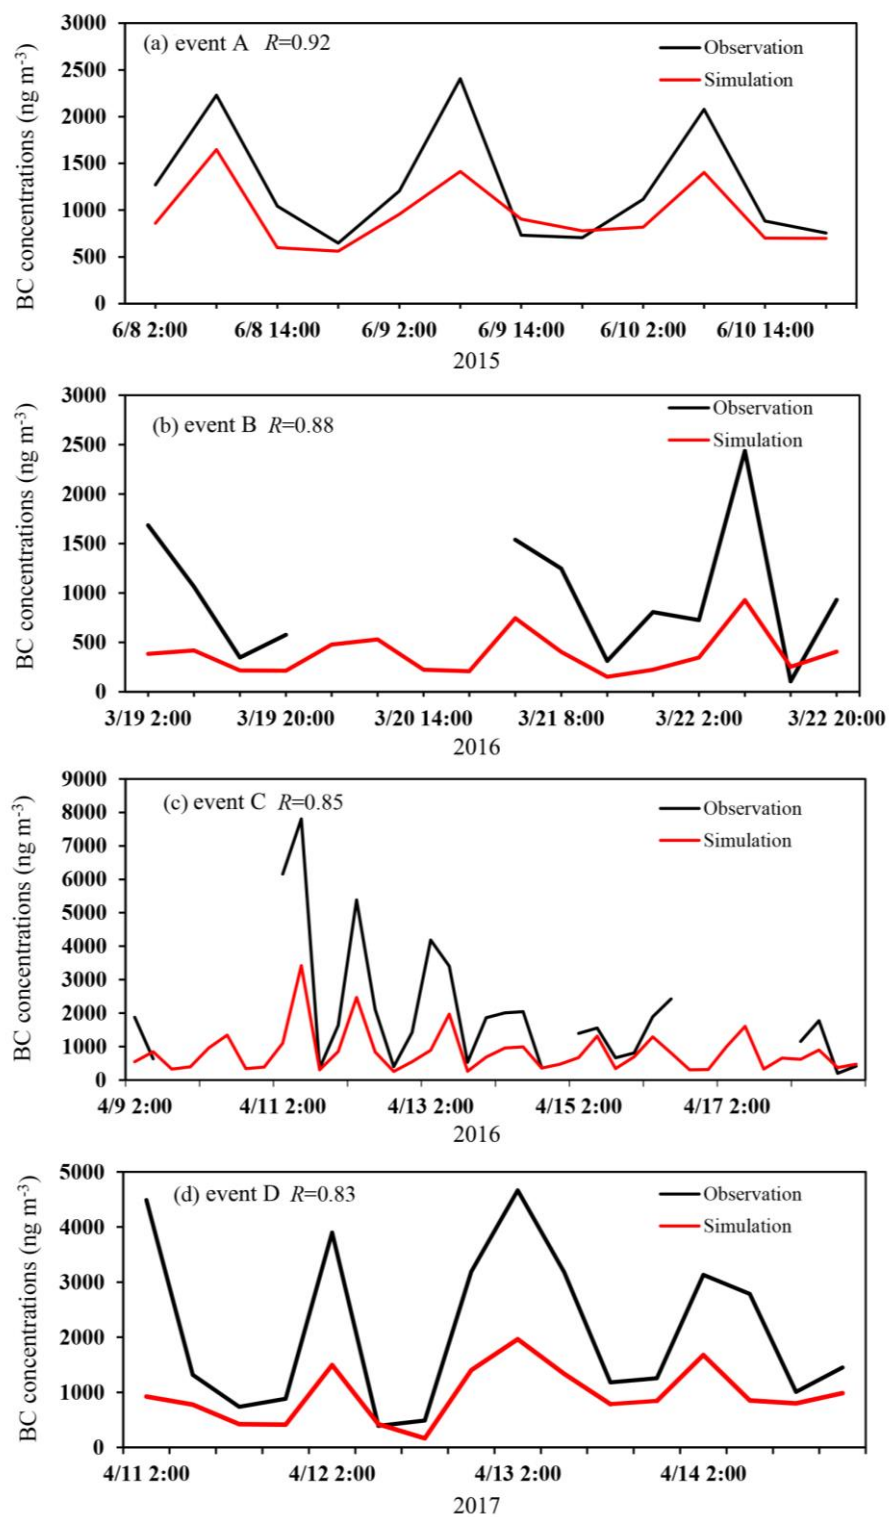

25 **Figure S3. Comparisons between simulated BC concentrations and the observations at QOMS during the four pollution episodes: (a) event A, (b) event B, (c) event C, and (d) event D**

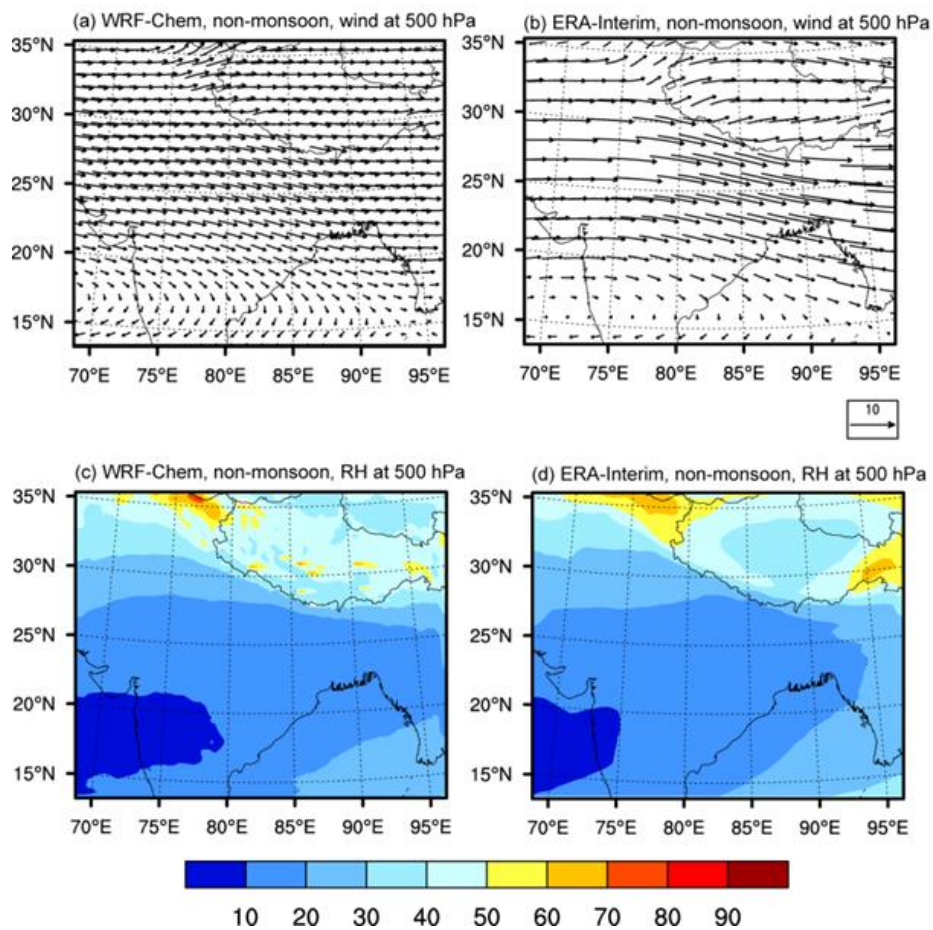

30 **Figure S4. Mean wind ( $\text{m s}^{-1}$ ) and relative humidity (RH, %) at 500 hPa during the non-monsoon seasons from the WRF-Chem simulation (a, c) and the ERA-Interim (b, d), respectively.**

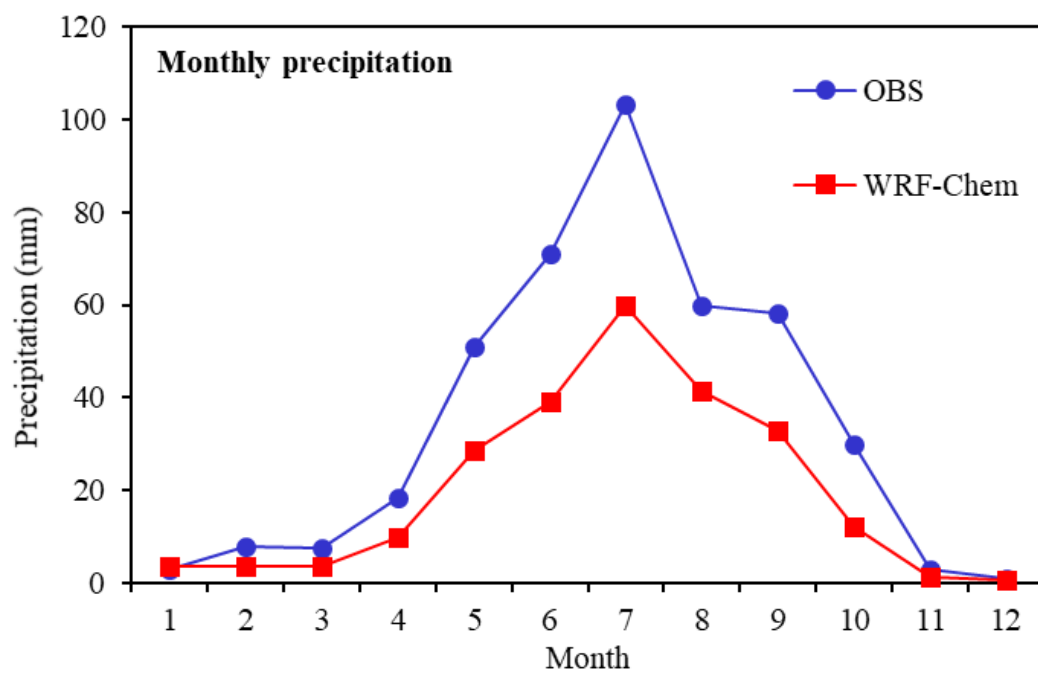

Figure S5. Monthly mean precipitation in 2013, averaged at 73 sites over the TP. Data are from the observations at national stations (OBS) and the model simulation in this study (WRF-Chem).



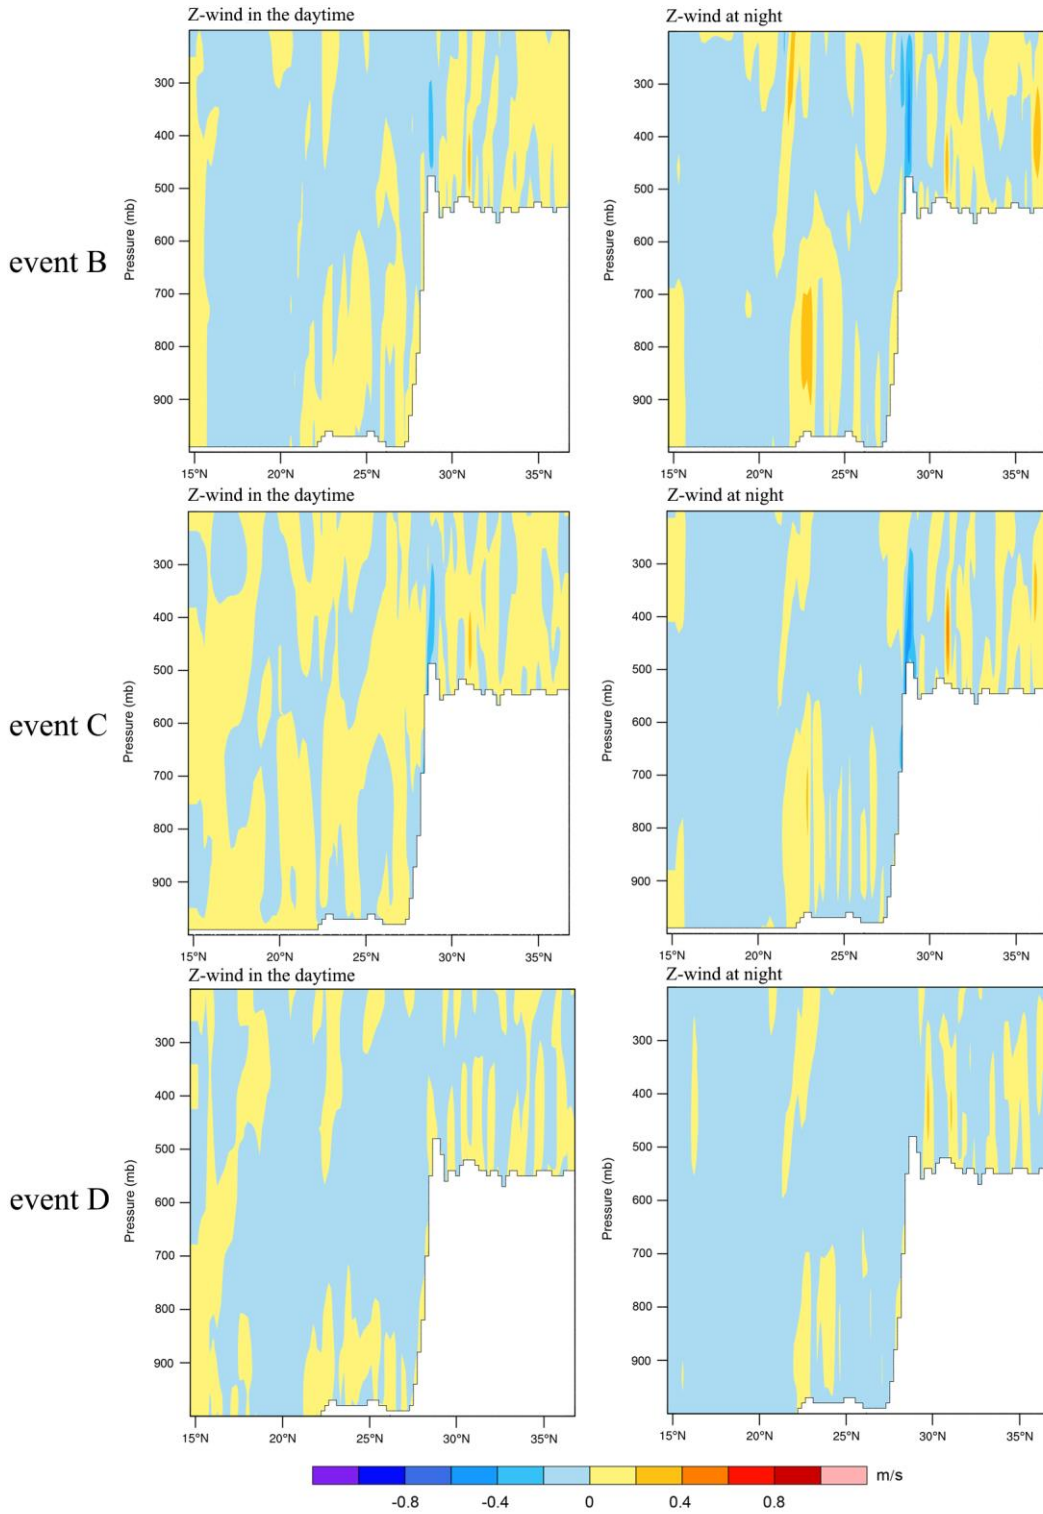

**Figure S6.** Vertical profile of mean wind at QOMS and its vicinities in the daytime and at night: event B (the first row), event C (the second row) and event D (the last row).
