# Supplementary material for: Concentration, temporal variation and sources of black carbon in the Mount Everest region retrieved by real-time observation and simulation
Source: Copernicus journal article supplement (doi:10.5194/acp-2018-183), 2018-03-09
Supplement: Supplementary file [file Editorial Certificate.pdf › Editorial Certificate.pdf]

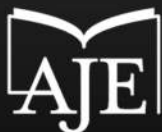

# EDITORIAL CERTIFICATE

This document certifies that the manuscript listed below was edited for proper English language, grammar, punctuation, spelling, and overall style by one or more of the highly qualified native English speaking editors at American Journal Experts.

## Manuscript title:

Concentration, temporal variation and sources of black carbon in the Mount Everest region retrieved by real-time observation and simulation

## Authors:

Xintong Chen, Shichang Kang, Zhiyuan Cong, Junhua Yang, Yaoming Ma

## Date Issued:

June 10, 2018

## Certificate Verification Key:

4D2D-508A-426B-4AE9-D8E9

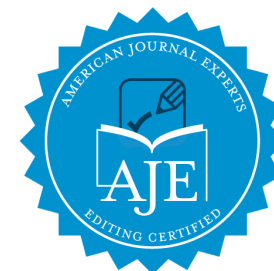

This certificate may be verified at [www.aje.com/certificate](http://www.aje.com/certificate). This document certifies that the manuscript listed above was edited for proper English language, grammar, punctuation, spelling, and overall style by one or more of the highly qualified native English speaking editors at American Journal Experts. Neither the research content nor the authors' intentions were altered in any way during the editing process. Documents receiving this certification should be English-ready for publication; however, the author has the ability to accept or reject our suggestions and changes. To verify the final AJE edited version, please visit our verification page. If you have any questions or concerns about this edited document, please contact American Journal Experts at [support@aje.com](mailto:support@aje.com).
